# Supplementary material for: Transcription-coupled genetic instability marks acute lymphoblastic leukemia structural variation hotspots
Source: eLife journal article supplement (doi:10.7554/elife.13087), 2016-07-15
Supplement: figures [file elife-13087-figures-v1.pdf]

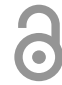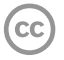

---

## Figures and figure supplements

Transcription-coupled genetic instability marks acute lymphoblastic leukemia structural variation hotspots

**Merja Heinäniemi et al**

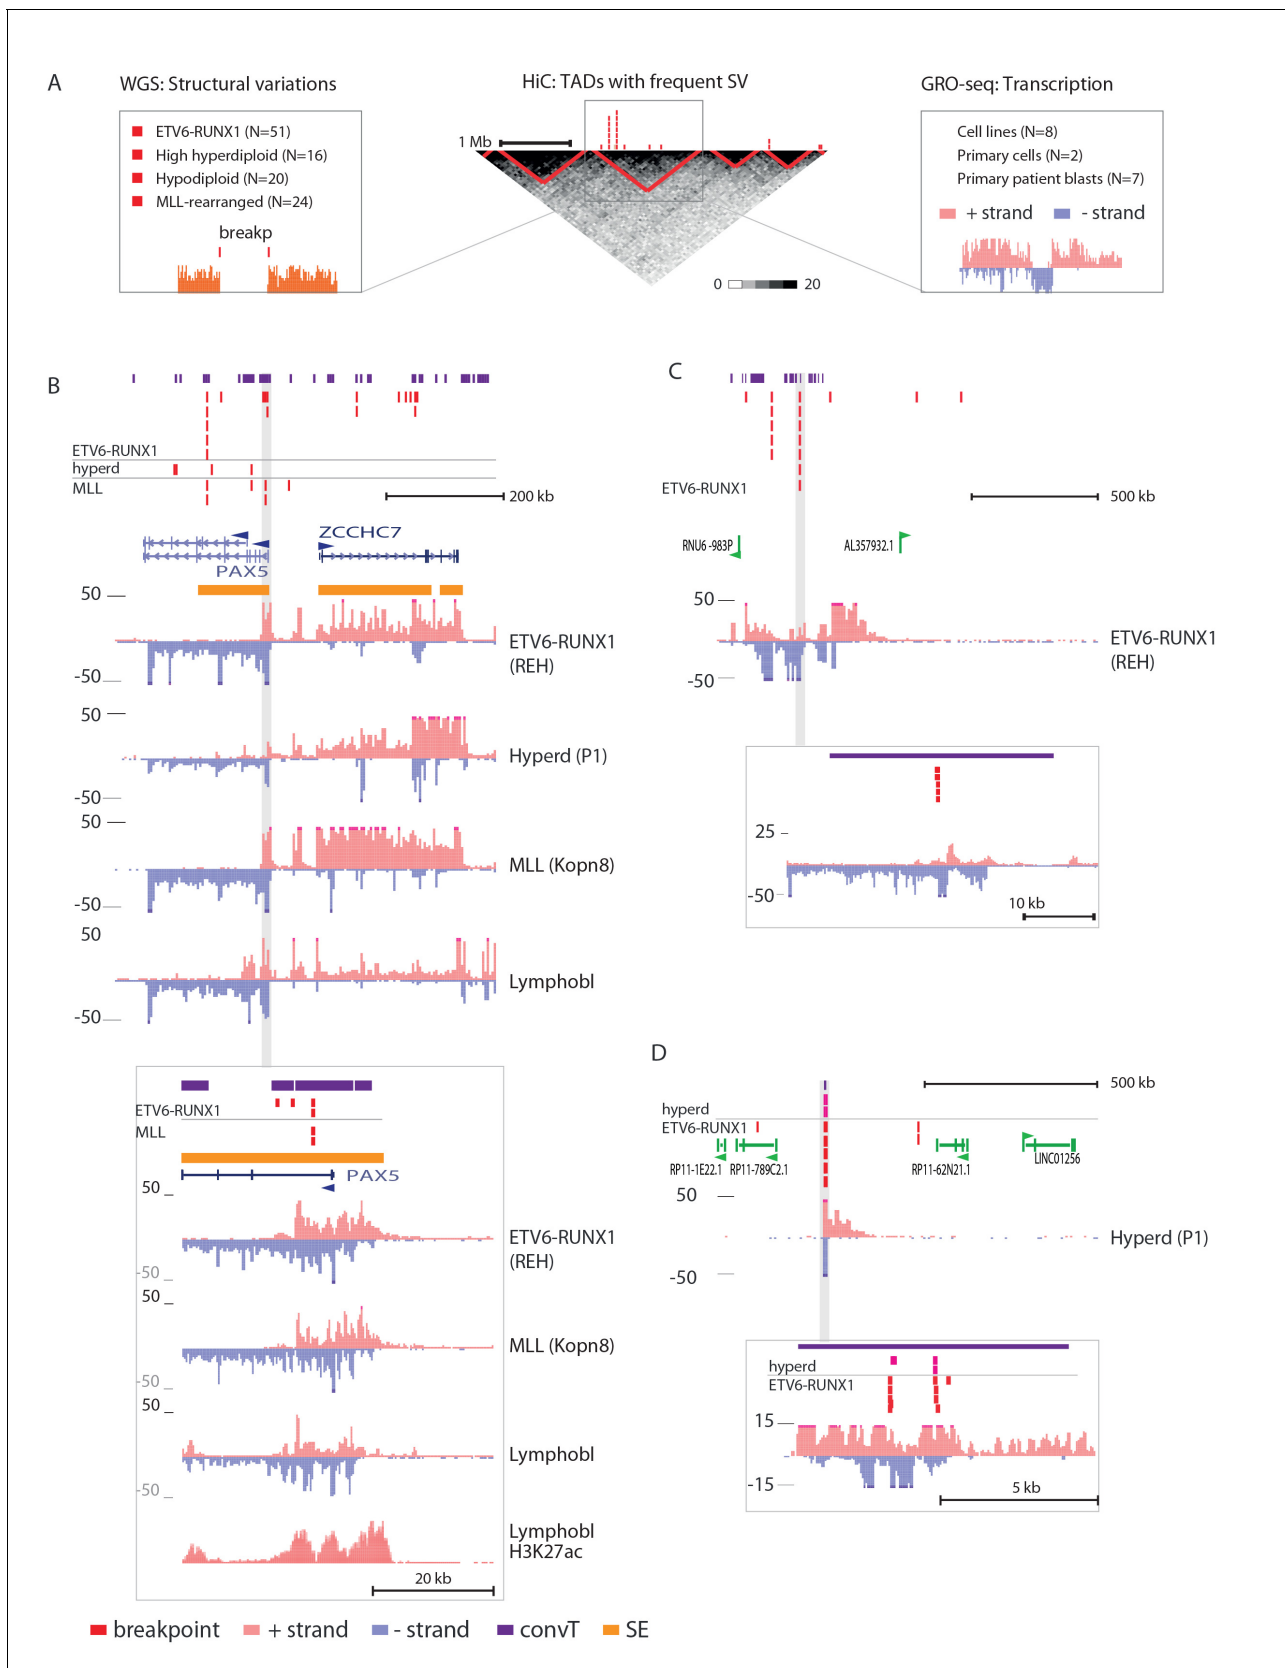

**Figure 1.** Integrative analysis of transcription and high-recurrence SV sites highlights novel transcribed regions. (A) WGS data from the ETV6-RUNX1 (51 cases; *Papaemmanuil et al., 2014*), high hyperdiploid (16 cases; *Paulsson et al., 2015*), hypodiploid (20 cases; *Holmfeldt et al., 2013*) and MLL-  
Figure 1 continued on next page

## Figure 1 continued

rearranged (22 cases; [Andersson et al., 2015](#)) subtypes of precursor B-ALL was integrated with profiles of transcriptional activity assayed using GRO-seq from ALL patient and cell line samples (see also [Figure 1—figure supplement 1](#) and [Supplementary file 1](#)). HiC data from B-lymphoid cells ([Rao et al., 2014](#)) was used to define TADs based on the HiC interaction frequency, shown as grey scale heatmap, in order to distinguish TADs with highest frequency of SV. (B) The *PAX5* and *ZCCHC7* loci are located in the TAD shown that has high SV frequency in hyperdiploid, ETV6-RUNX1- and MLL-fusion positive patients (4, 20 and 6 breakpoints, respectively, [Figure 1—source data 1](#)). The GRO-seq signal profiles from three pre-B-ALL cytogenetic subtypes and normal B-lymphoblastoid cells are displayed as indicated in the figure (see also [Figure 1—figure supplement 4](#) and [Figure 2—figure supplement 2](#)). The y-axis shows the normalized read density (plus strand in red, minus strand in blue). convT regions are indicated in purple and leukemia breakpoints in red. The TSS region of *PAX5* overlaps convT that co-localized with an intragenic SE (B-lymphoblastoid H3K27ac track is shown at the bottom). (C) A TAD with the same number of breakpoints (20) in ETV6-RUNX1 patients is shown with signal from REH cells (see also [Figure 1—figure supplement 4](#)). Genomic annotations include the location of GENCODE transcripts (in green). A strong transcription signal is visible that spans approximately 500 kb near the TAD boundary, lacking annotated transcripts. A zoom-in panel shows the most recurrent SV site. (D) The TAD visualized represents a genomic region that harbors most SV in HeH (see [Figure 1—figure supplement 5](#) for the hypodiploid SV hotspot). The GRO-seq signal (track from patient 1) indicates a novel locus with abundant transcription in leukemic samples (refer to [Figure 1—figure supplement 4](#) for all GRO-seq profiles). The highest recurrence of SV occurs at the convT overlapping mid-region (zoom-in panel), which has also two ETV6-RUNX1 breakpoints.

DOI: [10.7554/eLife.13087.003](https://doi.org/10.7554/eLife.13087.003)

The following source data is available for figure 1:

**Source data 1.** Identified topologically associated domains.

DOI: [10.7554/eLife.13087.004](https://doi.org/10.7554/eLife.13087.004)

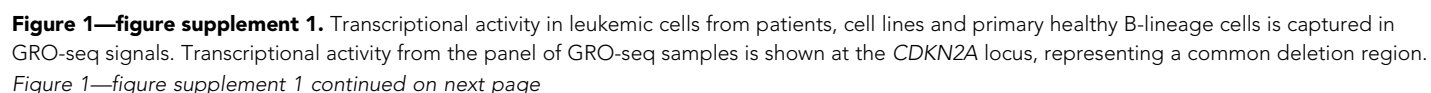



*Figure 1—figure supplement 1 continued*

The closer view from the TSS region (above) illustrates the signal features of convT and Pol2 stalling that were computationally analyzed genome-wide (signal is shown from Kopn-8 and B-lymphoblastoid cells). SV present in a subset of the assayed cell lines can be distinguished based on the loss of signal across an extended region (indicated as 'del'). The cell lines with intact locus are shown first, followed by REH and Nalm6 cells that carry an extensive deletion and thus have no signal in the region shown, and three T-ALL cell lines with compact deleted regions. Primary patient data from diagnostic samples (right) can be examined in context of the cell lines (left) that represent complex genomes at relapse. B-lymphoblastoid and bone marrow CD19+ cells represent normal healthy cells. The Kopn-8 cell line carries an MLL rearrangement. The y-axis in the tracks shows the normalized read density and transcription from different strands is shown in tones of red (+ strand) and blue (- strand) for clarity. NK = normal karyotype, T = T-ALL, P=patient sample.

DOI: [10.7554/eLife.13087.005](https://doi.org/10.7554/eLife.13087.005)

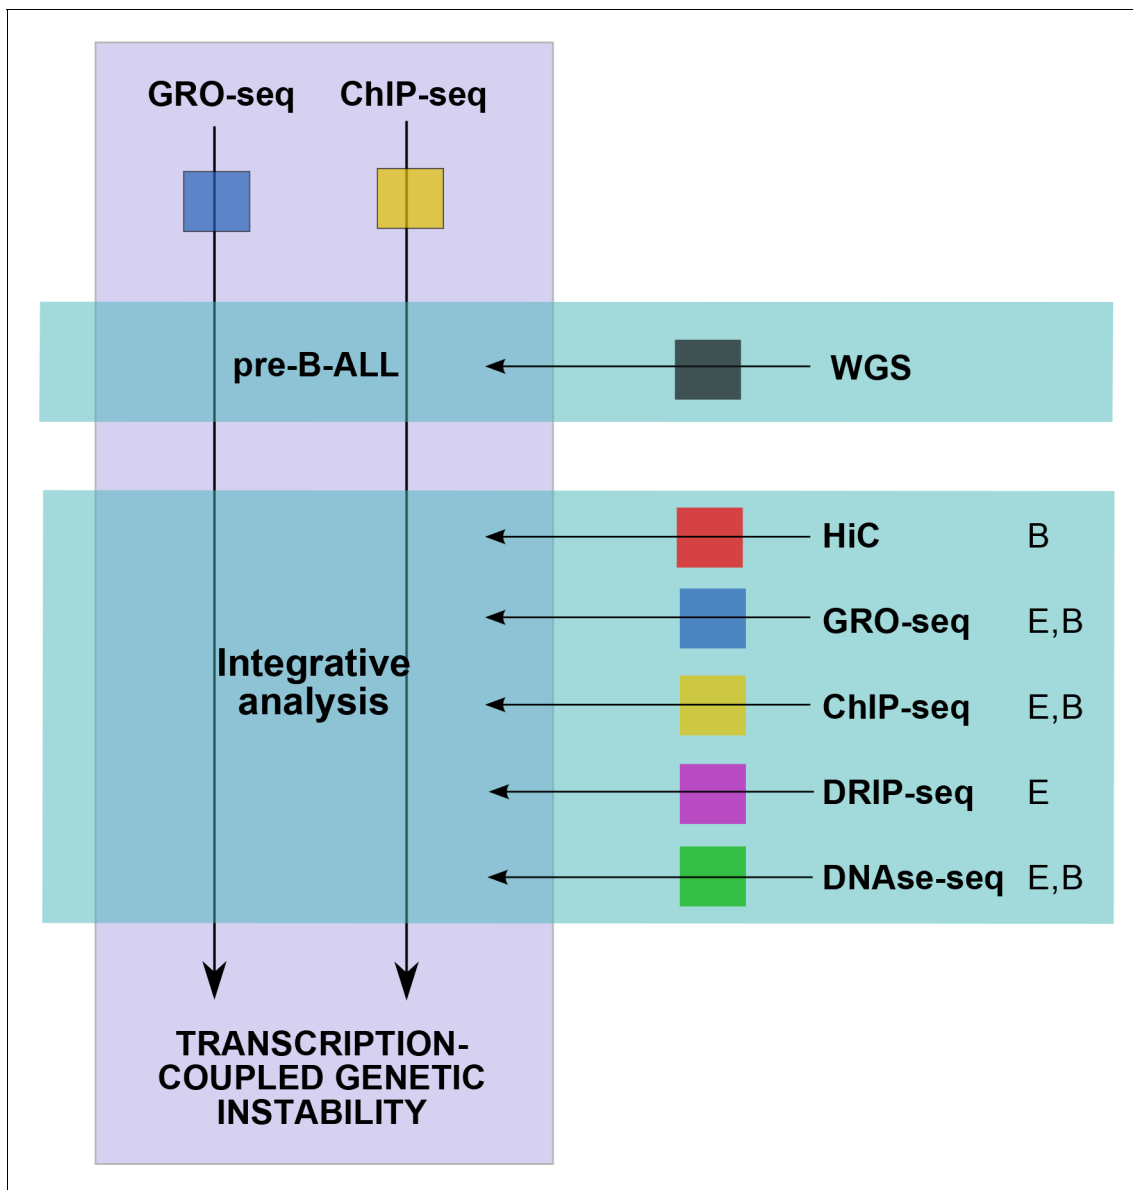

**Figure 1—figure supplement 2.** Summary of data used in the integrative analysis. GRO-seq and ChIP-seq data were generated from pre-B-ALL cells (**Supplementary file 1**) for studying transcription-coupled mechanisms in context of leukemia SV. The SV data was retrieved from four published WGS studies (**Holmfelt et al., 2013; Papaemmanuil et al., 2014; Andersson et al., 2015; Paulsson et al., 2015**) and jointly analyzed with the signal profiles. To distinguish domains in the genome with high SV frequency, HiC data was retrieved from B-lymphoblastoid cells (**Rao et al. 2014**) and used to define TADs (**Figure 1—source data 1**). This initial analysis led to the identification of specific transcription signal features that occur frequently at breakpoints (convT and Pol2 stalling, **Figure 2—source data 1**). In order to characterize the properties of convT and Pol2 stalling sites genome-wide, additional analysis utilized further genomic profiles from B-lineage (B) and ES (E) cells (**The ENCODE Project Consortium, 2012; Ginno et al., 2013**). Inclusion of normal cell types allowed us to control for possible caveats in analyzing the signal from complex cancer genomes. In addition to the data shown, RSS and RLFS sequence motif analysis was used to distinguish DNA-encoded features.

DOI: [10.7554/eLife.13087.006](https://doi.org/10.7554/eLife.13087.006)

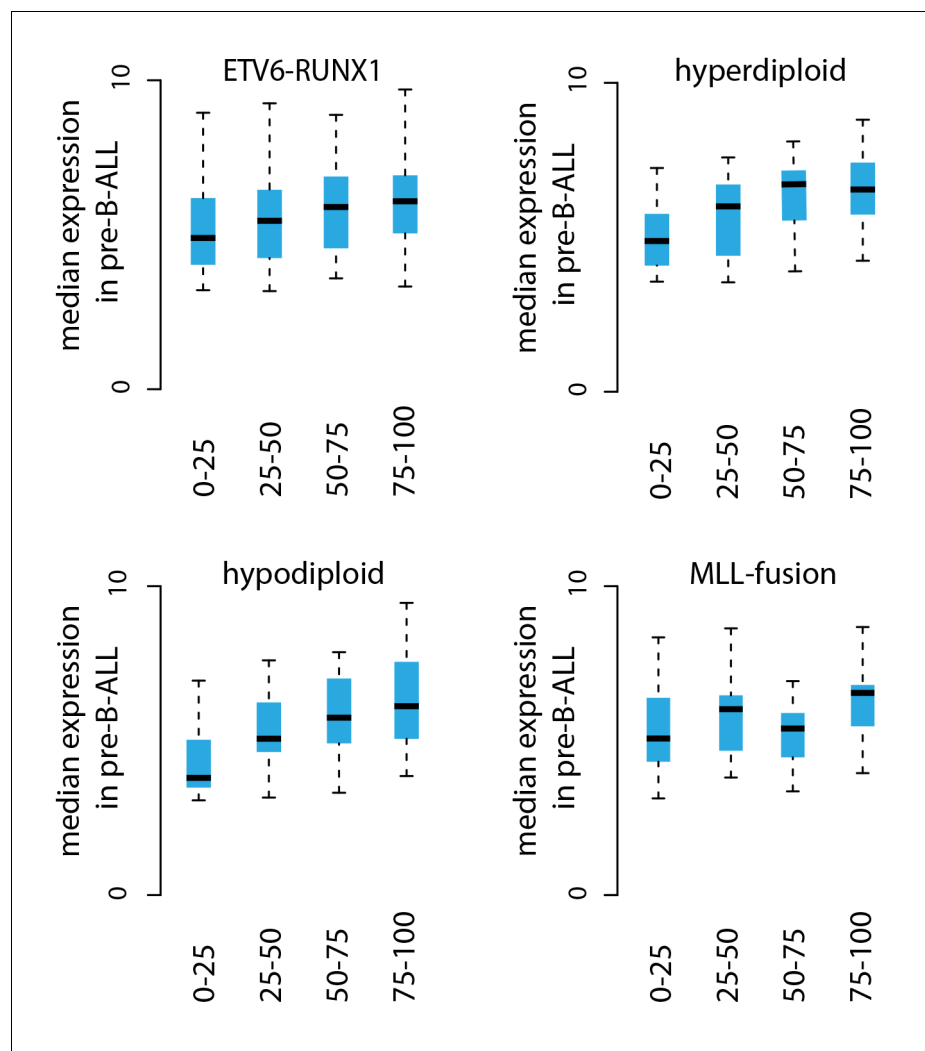

**Figure 1—figure supplement 3.** Transcriptional activity in TADs binned by breakpoint frequency. The median transcription level (log2 signal) in pre-B-ALL patients (N = 1382) is summarized as boxplots from TADs divided into quartiles based on number of breakpoints per bp.

DOI: [10.7554/eLife.13087.007](https://doi.org/10.7554/eLife.13087.007)

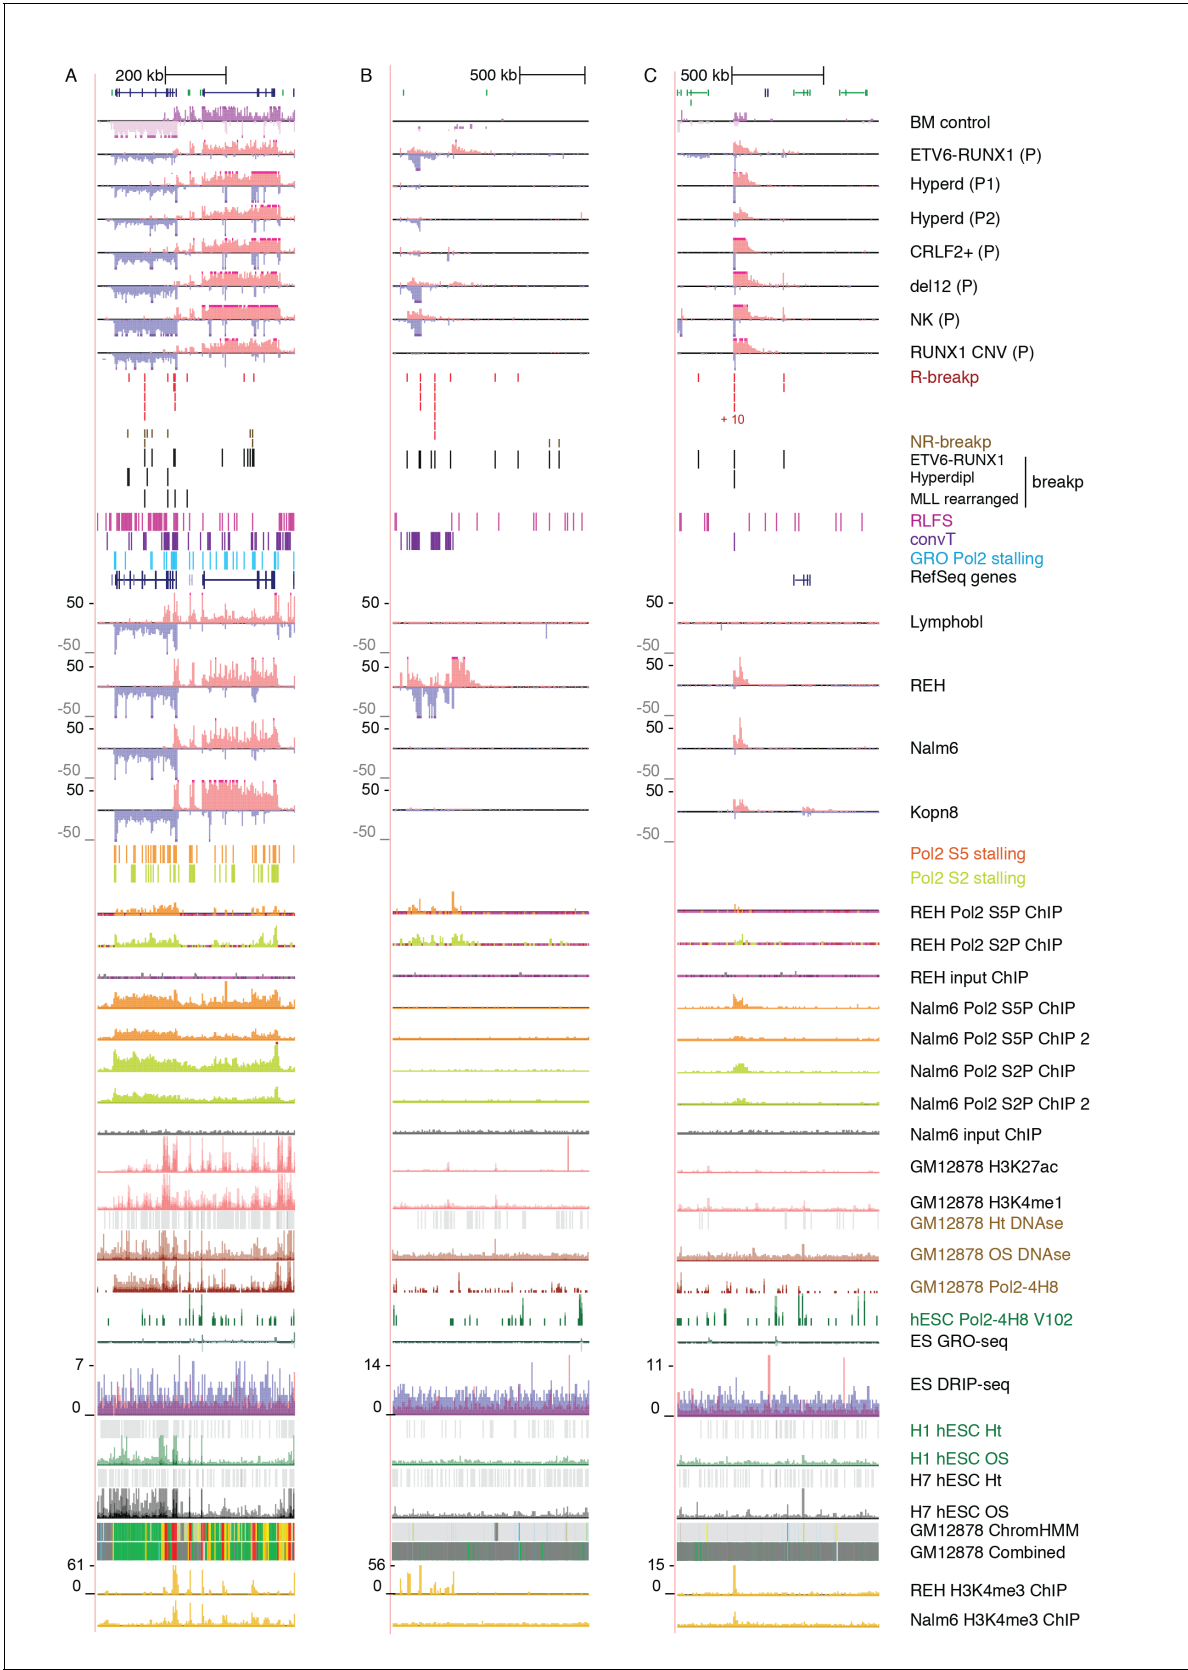

**Figure 1—figure supplement 4.** Data from all signal tracks for regions displayed in **Figure 1**. The comprehensive set of signal and annotation tracks shown are organized as follows: Leukemia patient GRO-seq tracks are shown first, followed by leukemia breakpoint data. Next, vulnerable regions

*Figure 1—figure supplement 4 continued on next page*

*Figure 1—figure supplement 4 continued*

based on transcriptional features and cell line GRO-seq tracks are shown, followed by additional supporting tracks (Pol2 ChIP-seq, chromatin mark ChIP-seq and DNase-seq from B-lineage and ES cells). Unless otherwise indicated, the y-axis in the tracks are -25:25 in GRO-seq, 0:25 in Nalm6 ChIP-seq, 2:10 in REH ChIP-seq, 0:50 in DNase-seq OS, 0:0.5 in DNase-seq DS, 0–100 in Layered H3K27ac (from GM12878) and 0–50 in Layered H3K4me1 (from GM12878). The cytogenetic subtype in GRO-seq samples is indicated with abbreviations (refer to **Supplementary file 1**) and P denotes primary patient samples. Bone marrow CD19+ cells from healthy donors and B-lymphoblastoid cells serve as controls. **(A)** Region shown corresponds to **Figure 1A**. Similarly, the two TADs harboring non-coding transcripts are shown in **B** and **C**. **B**. The novel transcripts are also detected in a patient with normal karyotype (NK) and another patient with deletion of chr12 (del12).

DOI: [10.7554/eLife.13087.008](https://doi.org/10.7554/eLife.13087.008)

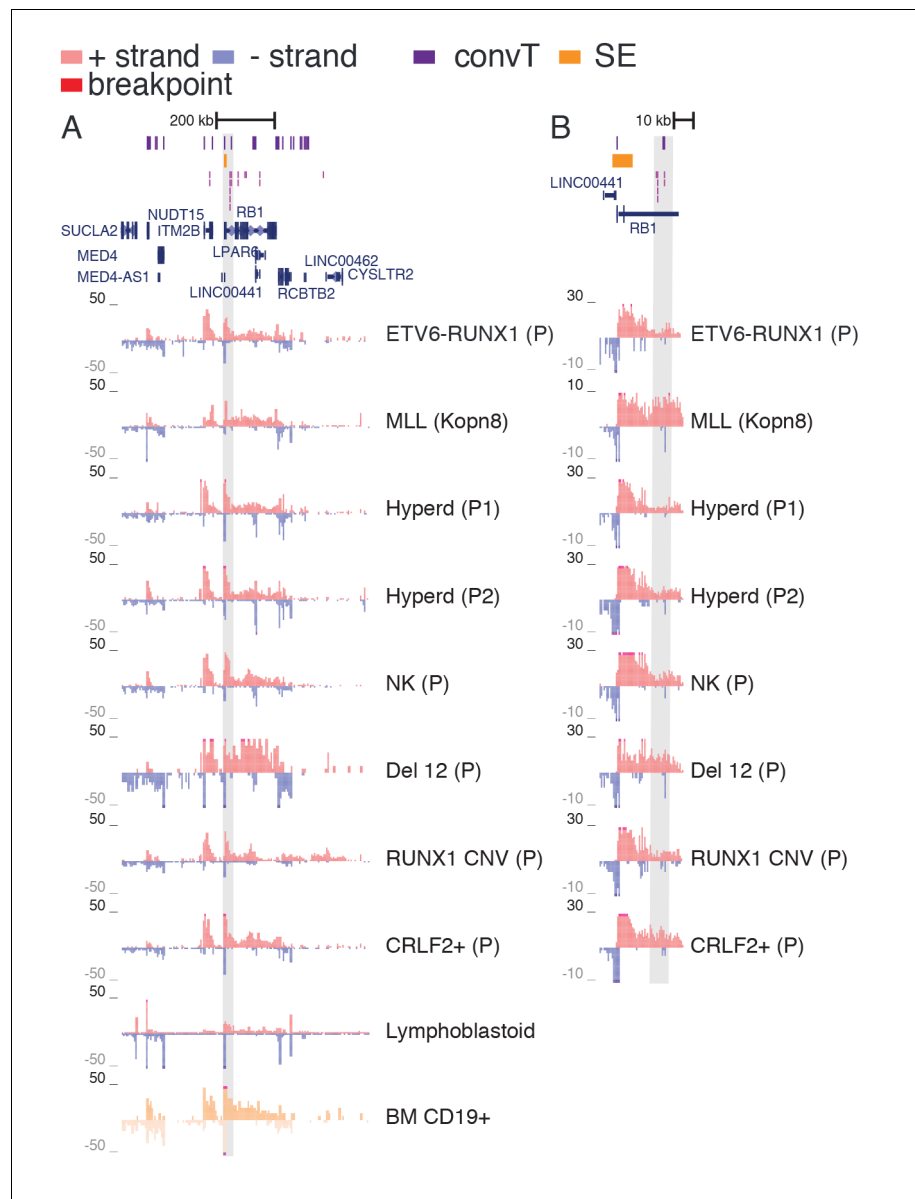

**Figure 1—figure supplement 5.** TAD with frequent SV in hypodiploid patients. (A) The TAD visualized represents a genomic region that harbors most frequent SV in hypodiploid ALL. The GRO-seq signals (shown as in **Figure 1**) represent pre-B-ALL patients or cell lines with different cytogenetic subtypes. Notice that GRO-seq signal specifically for a hypodiploid case is not available. (B) The highest recurrence of SV occurs at the convT overlapping region downstream *RB1* TSS.

DOI: [10.7554/eLife.13087.009](https://doi.org/10.7554/eLife.13087.009)

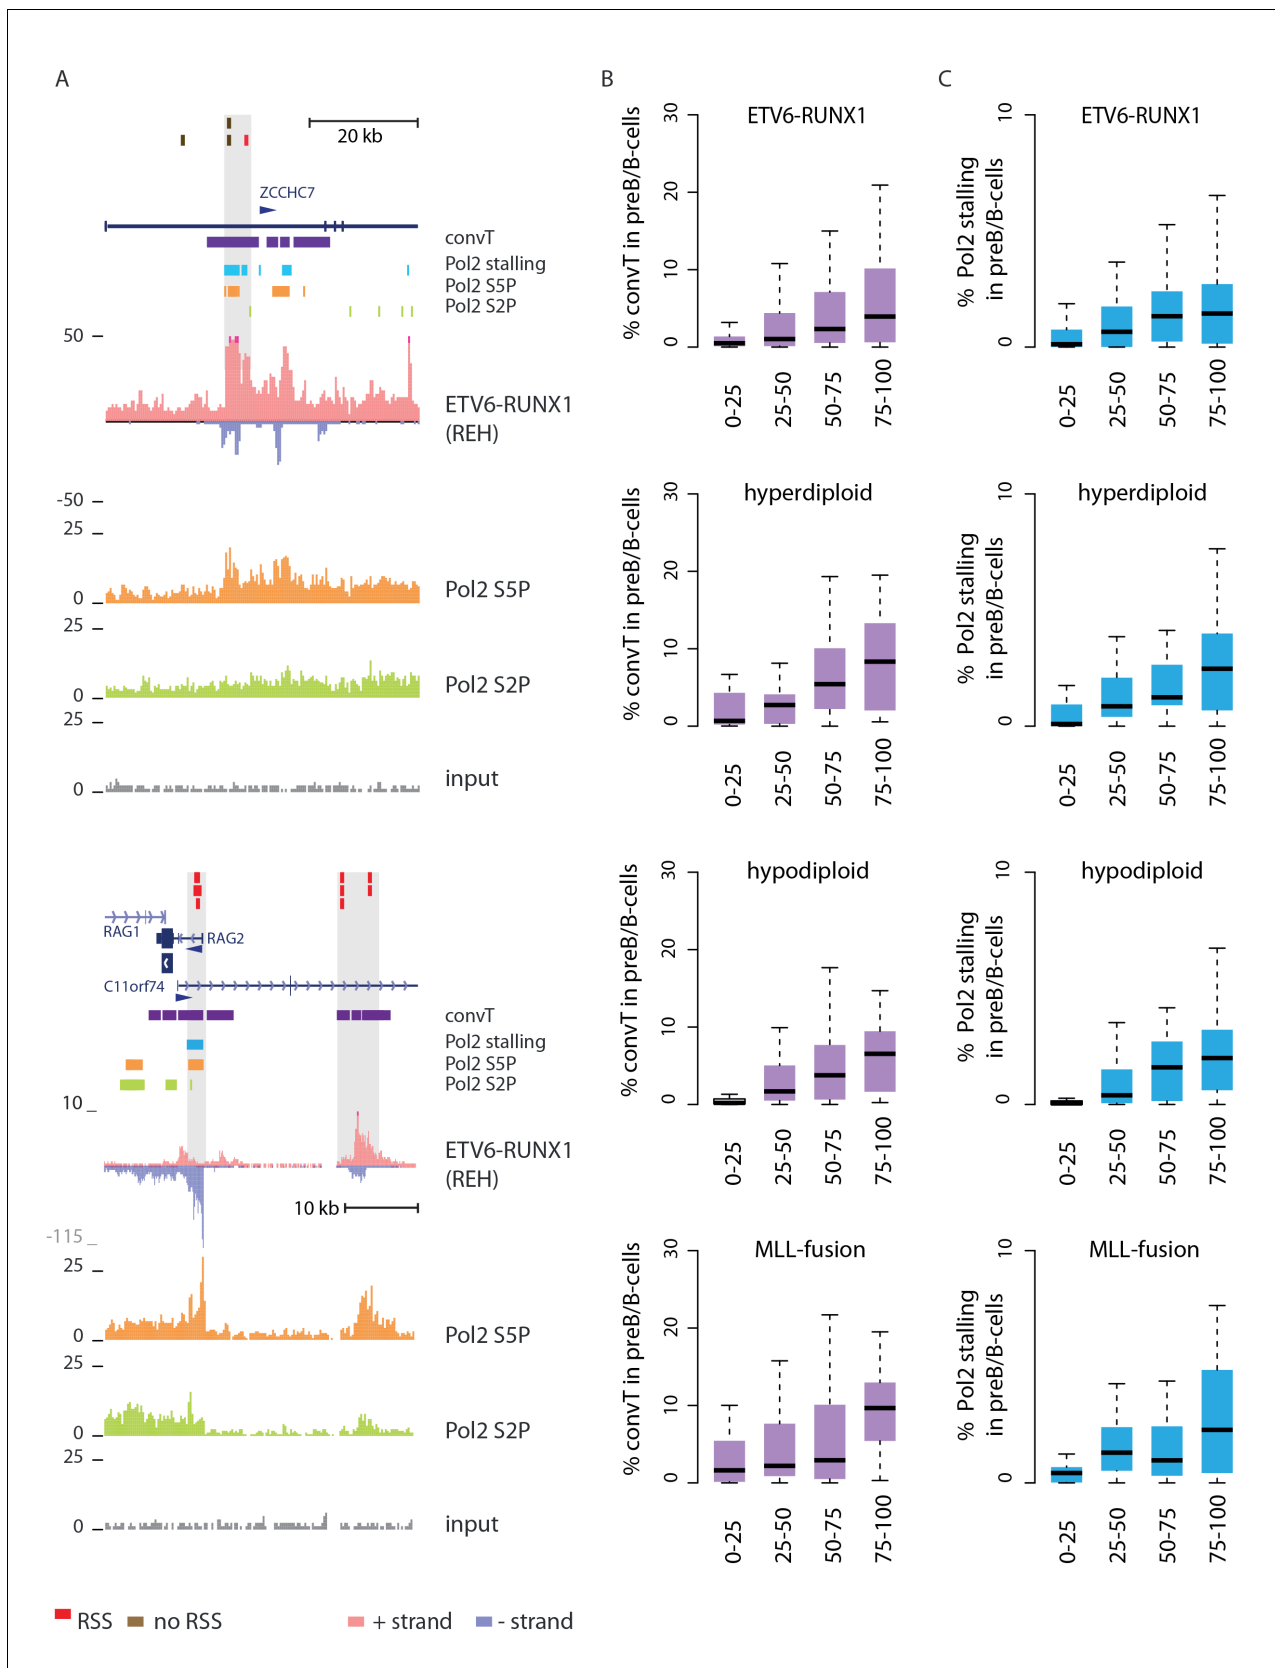

**Figure 2.** Convergent transcription and Pol2 stalling characterize genomic regions with high number of breakpoint events. (A) The GRO-seq signal in the ETV6-RUNX1 positive REH cell line is shown to exemplify the co-occurrence of convT (in purple) and local elevation in GRO-seq signal (Pol2 stalling, Figure 2 continued on next page

*Figure 2 continued*

in light blue) at both R- and NR-breakp (in red and brown, respectively) that reside within intronic (*ZCCHC7*), TSS (*RAG2*) or putative enhancer regions (*RAG2*). The elevated signal is also visible in Pol2 ChIP-seq signal (Pol2 S2P in green, Pol2 S5P in orange, input in grey). See also **Figure 2—figure supplement 1**. The percentage of TAD spanned by convT (in **B**) or Pol2 stalling (in **C**) in pre-B/B-lymphoid cells is summarized as boxplots from TADs divided into quartiles based on number of breakpoints per bp (see also **Figure 1—figure supplement 3**, **Figure 2—figure supplement 3–6**). The quartile ranges are for exclusive lower and inclusive upper value in the range, as indicated. Refer to **Figure 2—source data 1** for statistical analysis.

DOI: [10.7554/eLife.13087.010](https://doi.org/10.7554/eLife.13087.010)

The following source data is available for figure 2:

**Source data 1.** Identified convT and Pol2 stalling regions.

DOI: [10.7554/eLife.13087.011](https://doi.org/10.7554/eLife.13087.011)



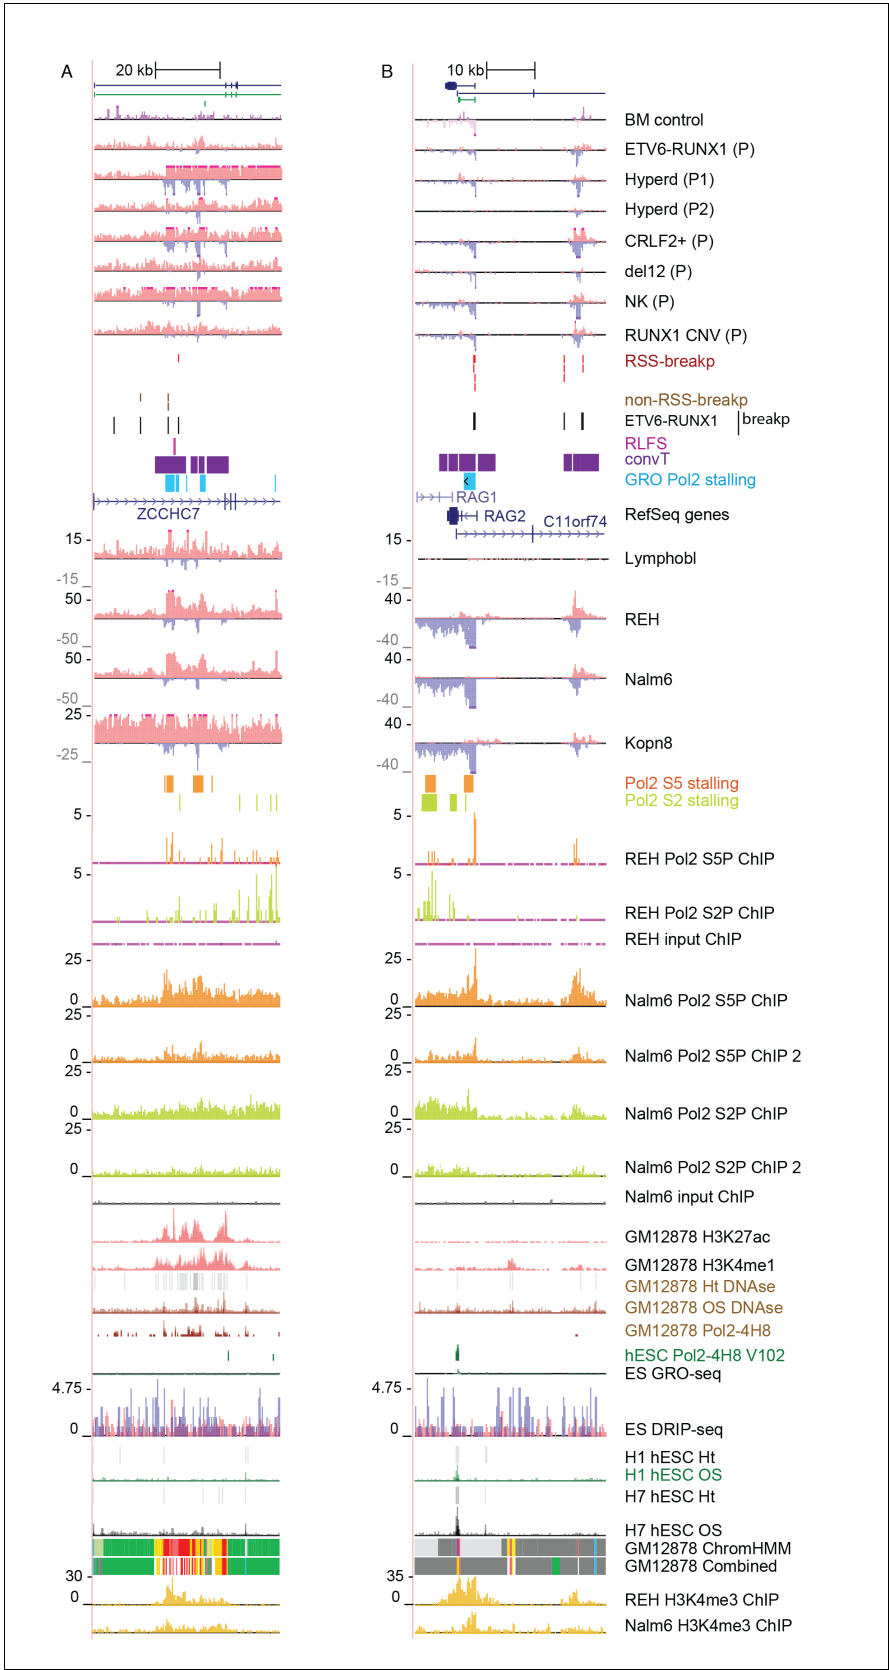

**Figure 2—figure supplement 1.** Data from all signal tracks for regions displayed in **Figure 2**. The comprehensive set of signal and annotation tracks shown are organized as in **Figure 1—figure supplement 4**. The regions displayed correspond to those in **Figure 2A**. The ZCCHC7 intronic region is shown in **A** and the RAG2 locus in **B**.

DOI: [10.7554/eLife.13087.012](https://doi.org/10.7554/eLife.13087.012)

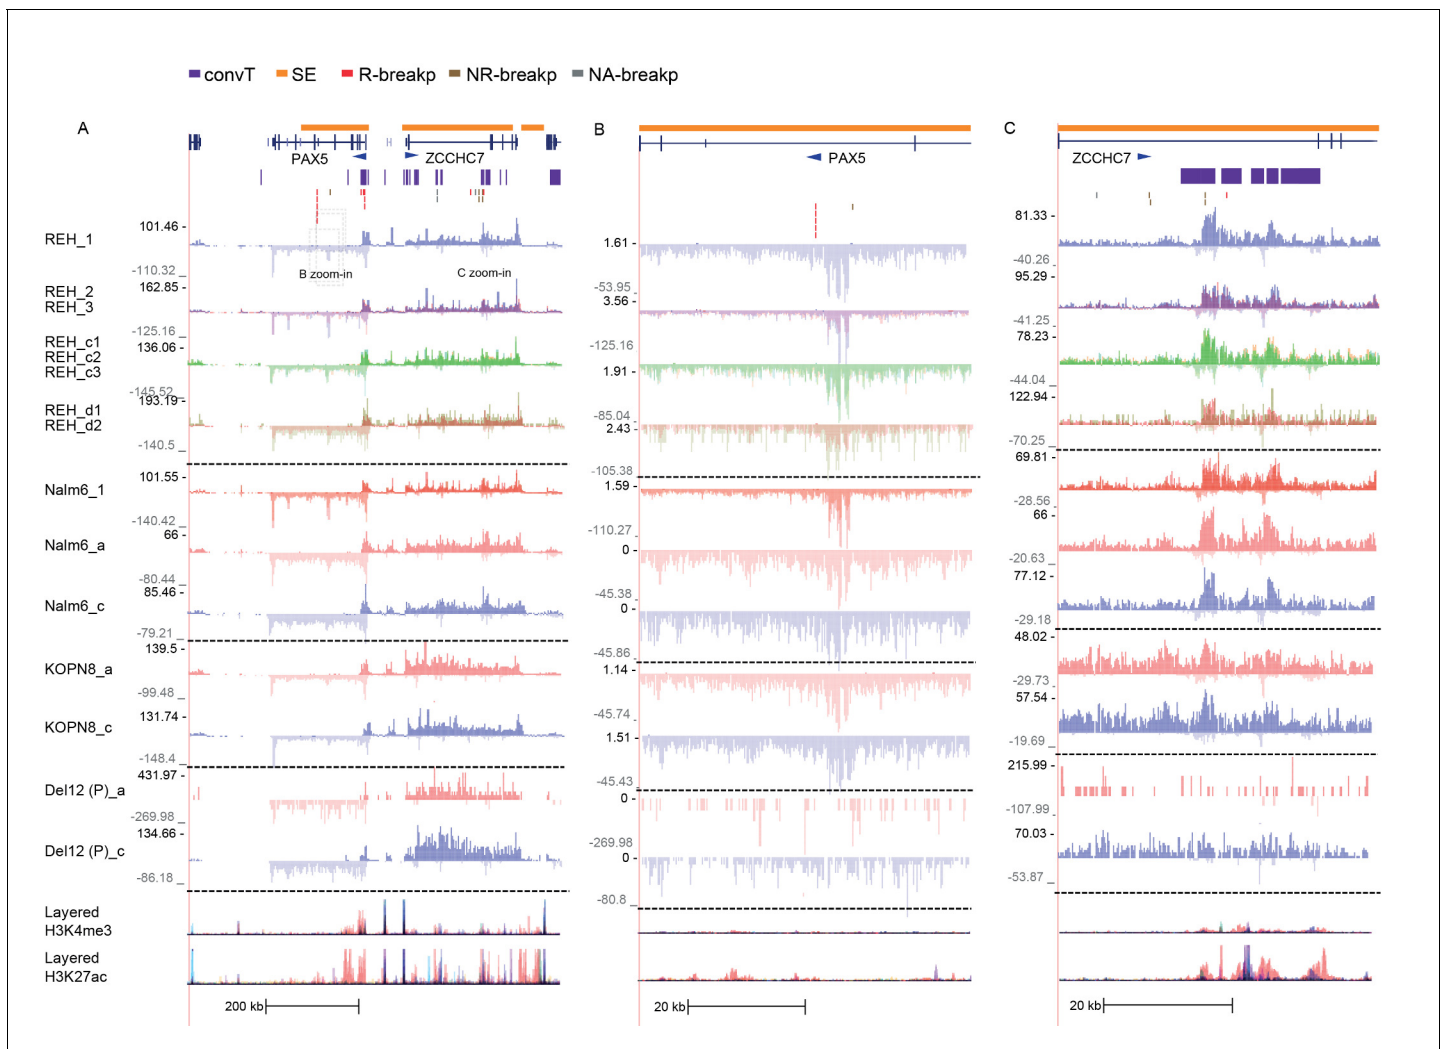

**Figure 2—figure supplement 2.** The GRO-seq signal from replicate samples generated from ALL cells displayed at the *PAX5/ZCCHC7* locus. A subset of GRO-seq samples were collected in multiple replicates in basal conditions from cells representing different genetic subtypes of ALL (refer to **Supplementary file 1** for details). The separate tracks (shown in panels A–C) correspond to independent experiments and the overlaid signals show the signal profile from biological replicates collected within each experimental condition. (A) The *PAX5/ZCCHC7* locus is shown (see also **Figures 1** and **2**), indicating the two regions that are displayed in more detail in panels B and C. The location of genes (in dark blue), SE (in yellow), convT regions (in purple) and breakpoints (R-breaks in red, NR-breaks in brown and unassigned in beige) are indicated above the signal tracks.

DOI: [10.7554/eLife.13087.013](https://doi.org/10.7554/eLife.13087.013)

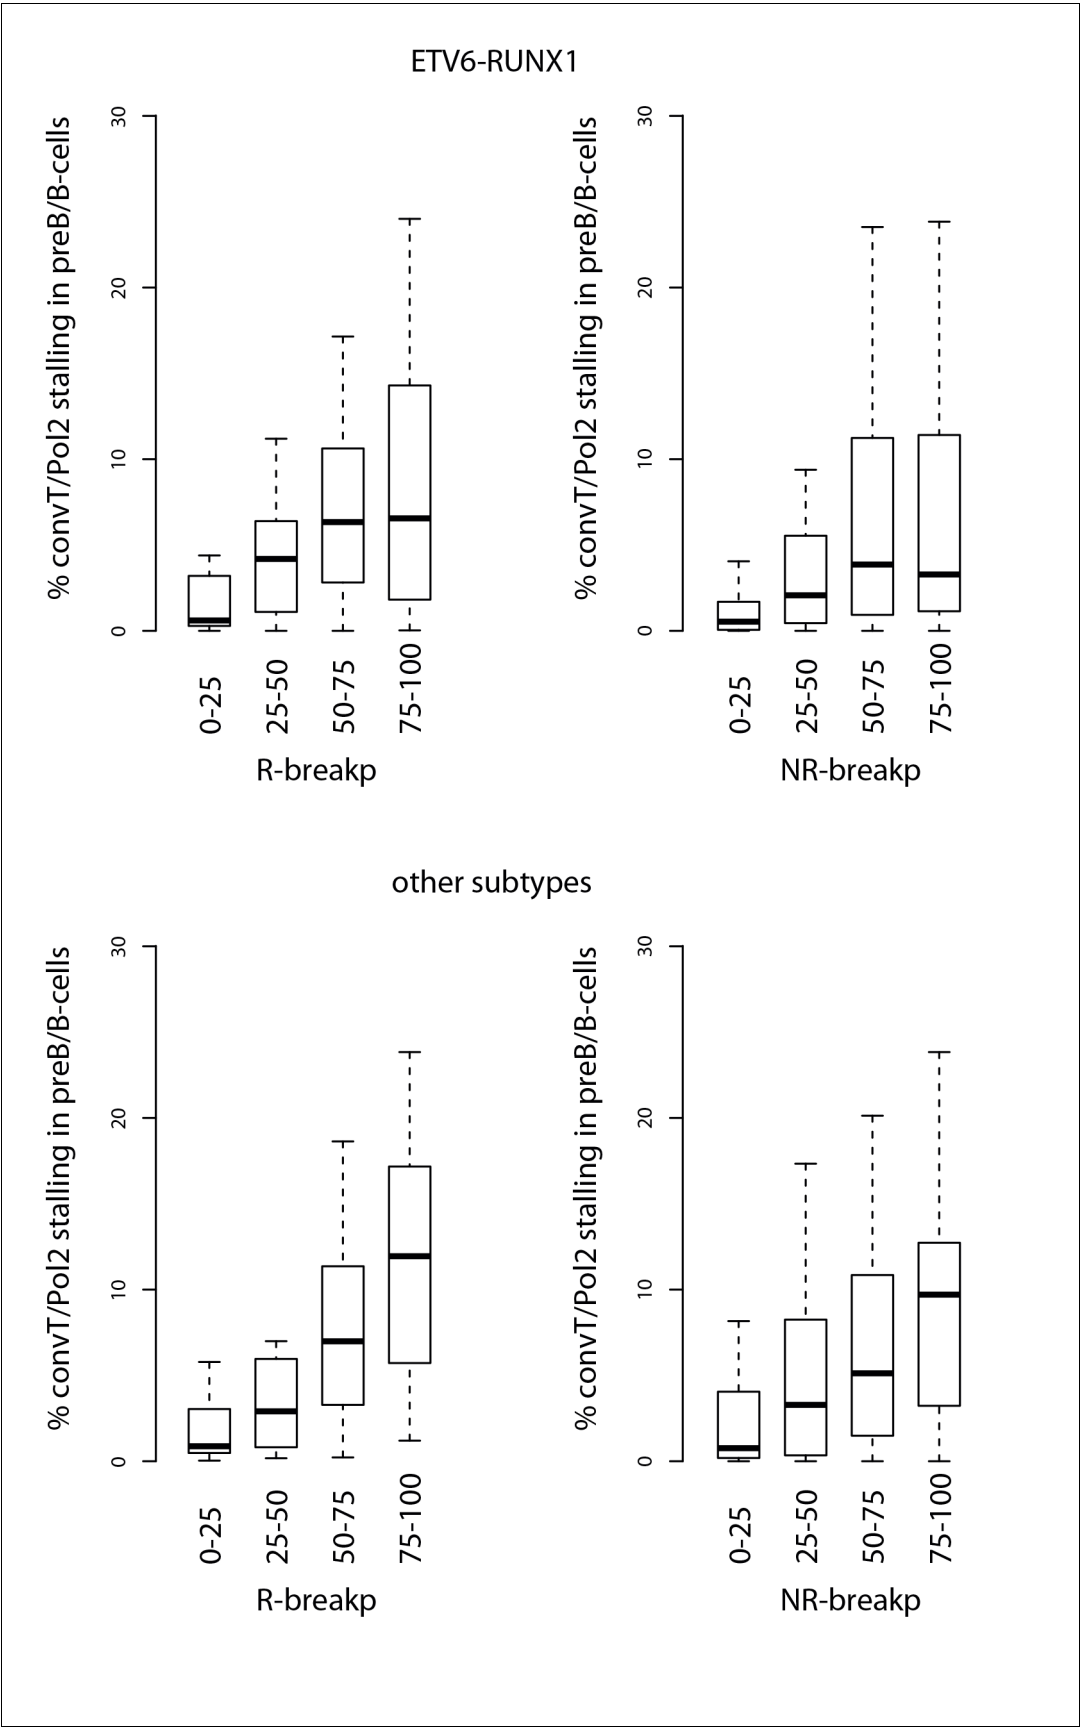

**Figure 2—figure supplement 3.** Signal feature span for TADs ordered separately by R-breakp or NR-breakp frequency. The overlap percentage for convT and Pol2 stalling is shown as in **Figure 2**. The ETV6-RUNX1 data compared to other pre-B-ALL subtypes is displayed. The RSS status annotation is based on motifs identified from ETV6-RUNX1 breakpoints (see Materials and methods).

DOI: [10.7554/eLife.13087.014](https://doi.org/10.7554/eLife.13087.014)

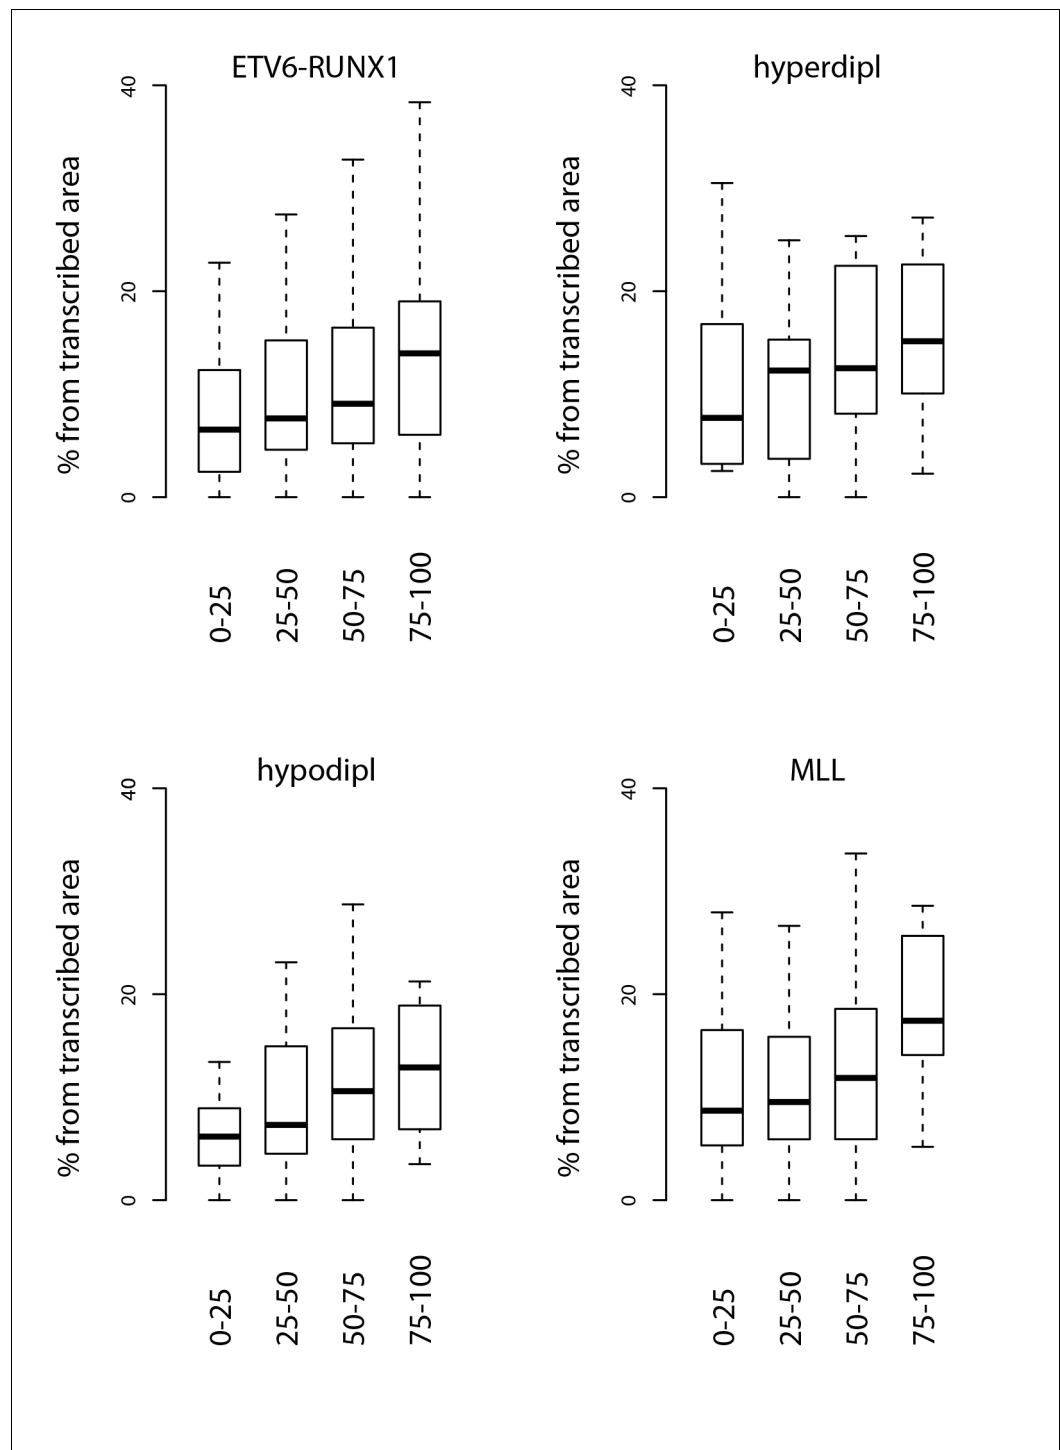

**Figure 2—figure supplement 4.** Signal feature span normalized by total transcribed area for TADs sorted by breakpoint frequency. The percentage from total transcribed area that corresponds to convT or Pol2 stalling is shown for TAD quartiles based on the the four different pre-B-ALL subtype SV datasets.

DOI: [10.7554/eLife.13087.015](https://doi.org/10.7554/eLife.13087.015)

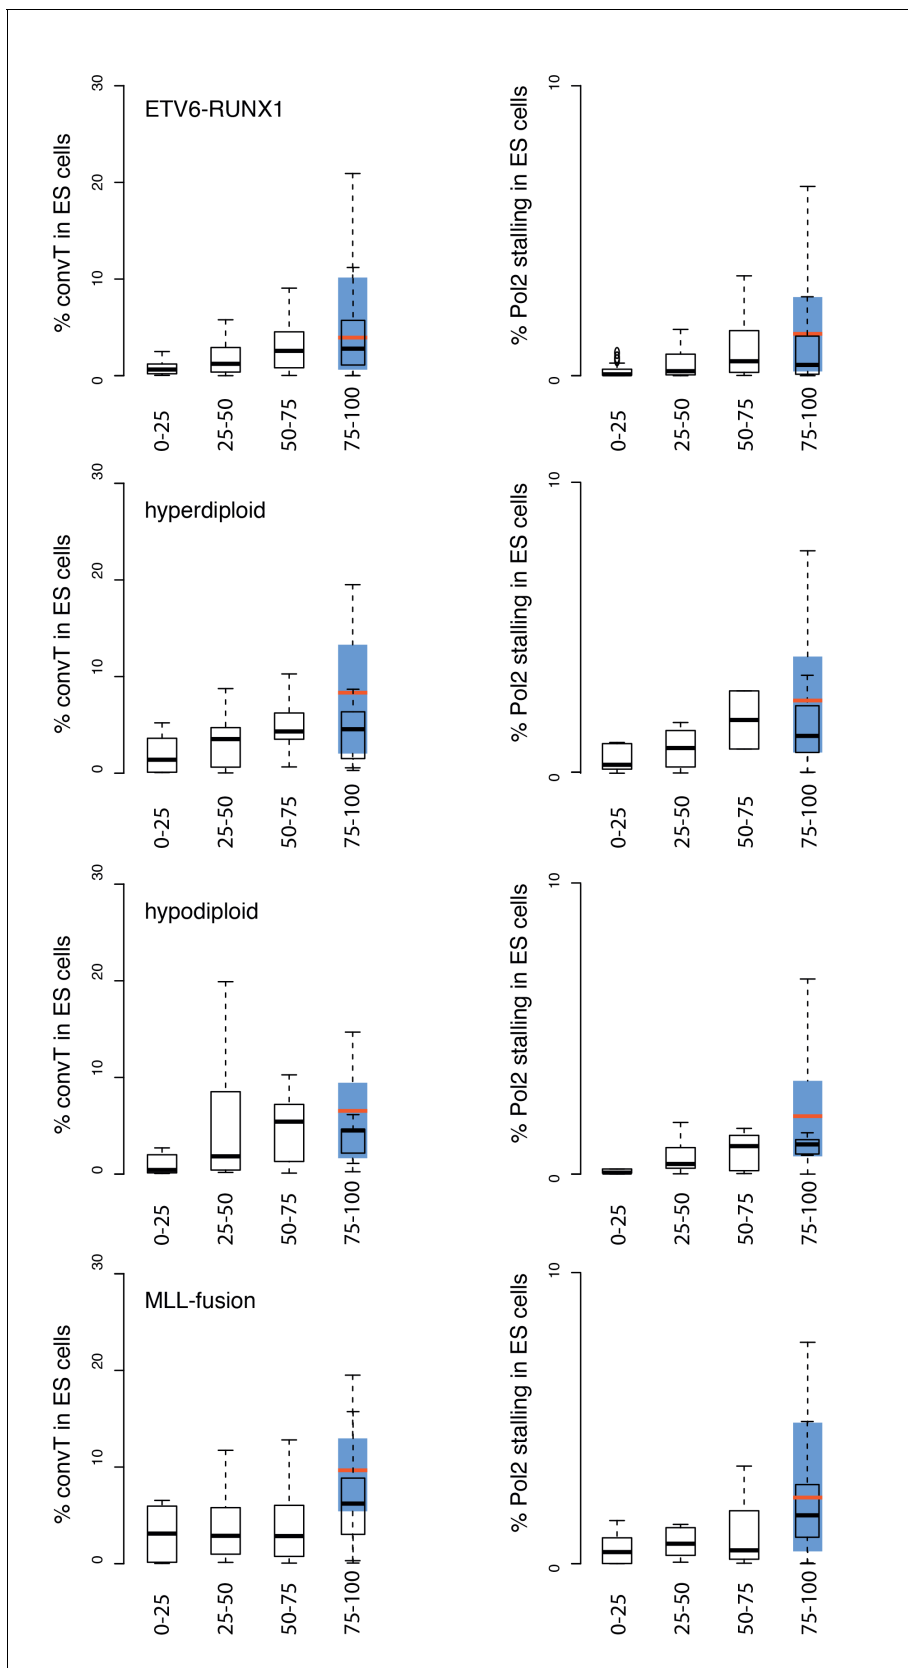

**Figure 2—figure supplement 5.** Overlap of TADs with convT in ES cells. The percentage of TAD spanned by convT in ES cells is summarized as boxplots, as in **Figure 2B and C**. The relative difference to results presented in **Figure 2** reflect cell type-specific transcriptional activity. To ease the

Figure 2—figure supplement 5 continued on next page

Figure 2—figure supplement 5 continued

comparison, the interquartile ranges for the overlap using relevant GRO-seq signals from pre-B/B-lymphoid cells are shown in blue (median plotted in red) for the highest SV frequency bin. The quartile ranges are for exclusive lower and inclusive upper value in the range, as indicated.

DOI: [10.7554/eLife.13087.016](https://doi.org/10.7554/eLife.13087.016)



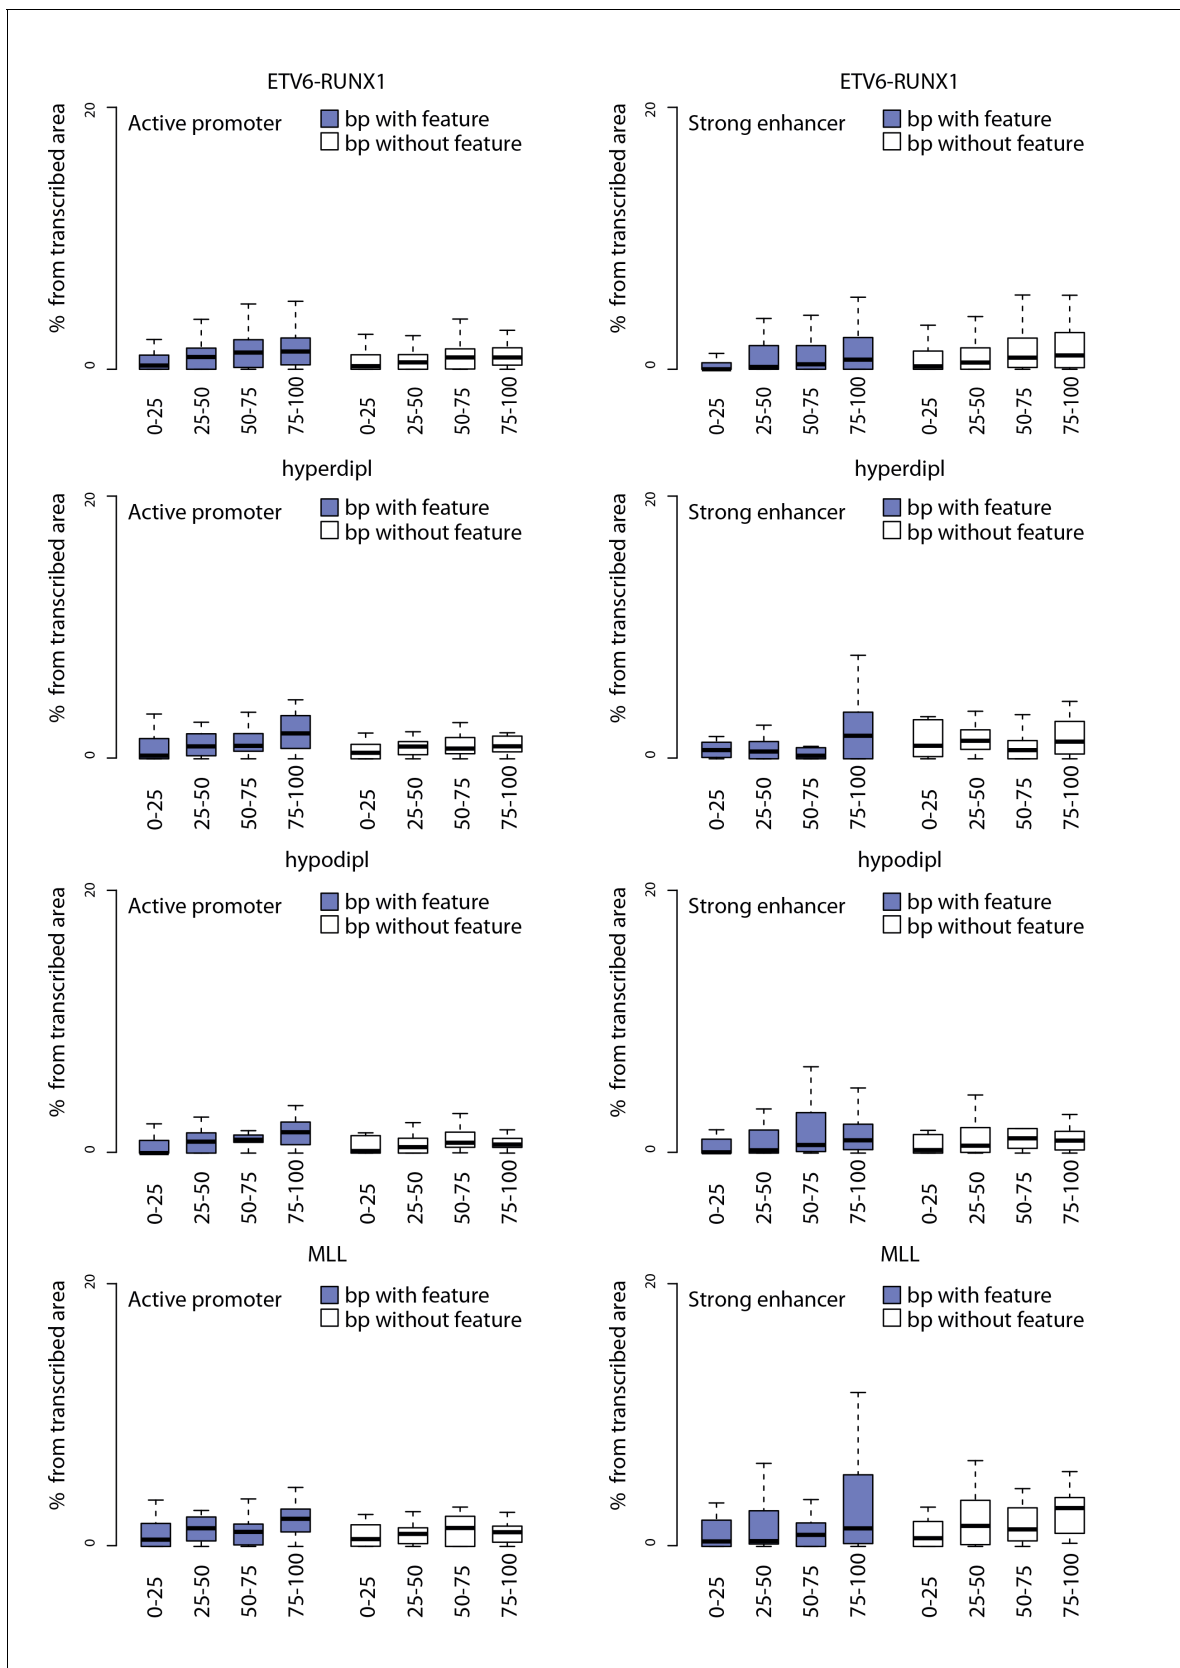

**Figure 2—figure supplement 6.** TAD analysis using promoter and enhancer chromatin segments stratified by convT and Pol2 stalling. Contribution of convT and Pol2 stalling within active promoter and enhancer regions retrieved based on the chromatin segmentation of ENCODE B-lymphoblastoid  
Figure 2—figure supplement 6 continued on next page

Figure 2—figure supplement 6 continued

cells is compared. Subregions within active promoters/enhancers that overlap convT/Pol2 stalling (in colored boxplots) or lack these features (no color) were used in the analysis comparing TAD quartiles. The data are normalized by total transcribed area as in **Figure 2—figure supplement 4**.

DOI: [10.7554/eLife.13087.017](https://doi.org/10.7554/eLife.13087.017)

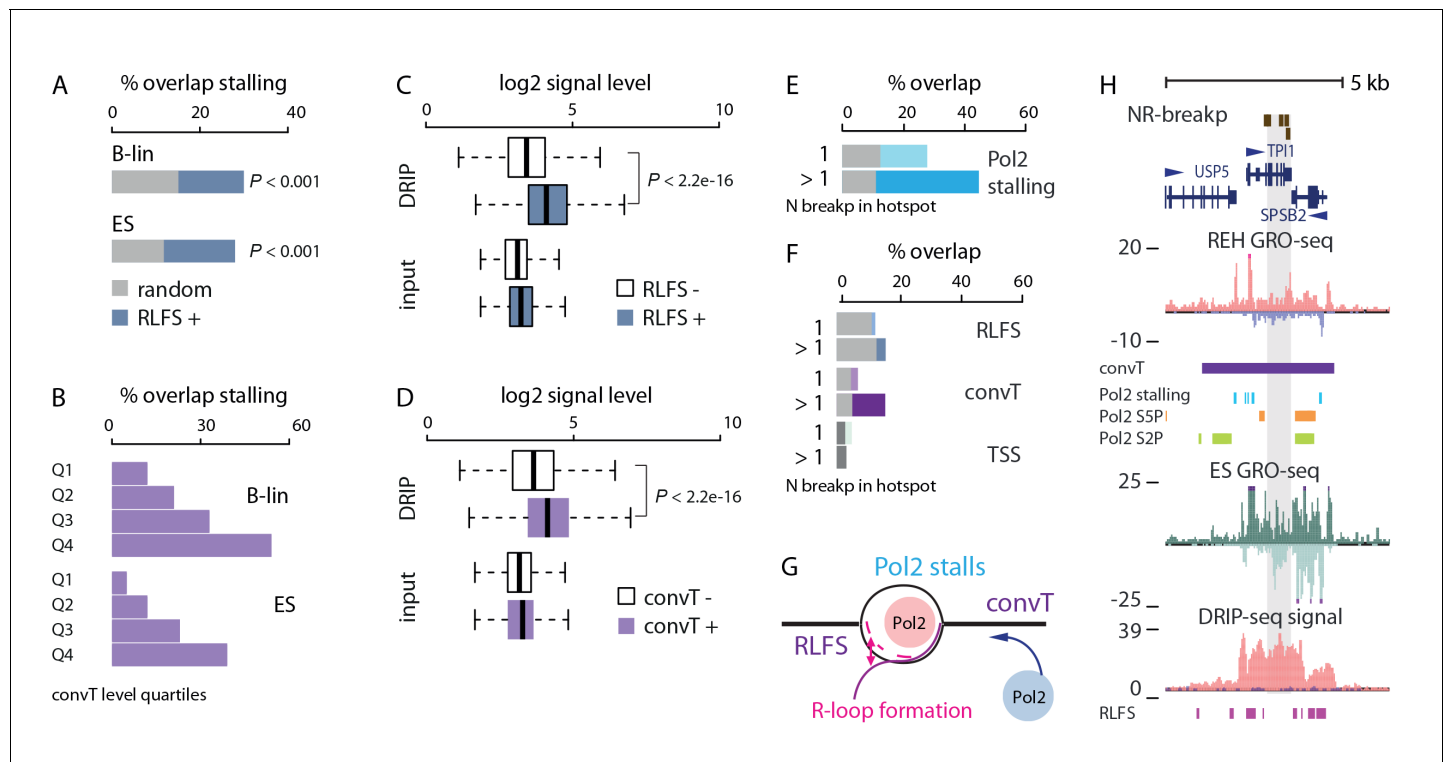

**Figure 3.** Indication of transcription-coupled genetic instability at leukemia SV hotspots lacking RSS motifs. (A) Overlap between RLFS motif harboring intragenic regions and detected Pol2 stalling sites in B-lineage and ES cells. The high overlap of RLFS-positive regions is statistically significant compared to random regions (empirical P is indicated for 30% and 28% overlaps, respectively). (B) Overlap of detected Pol2 stalling sites also increases based on the strength of antisense signal level for B-lineage and ES cell convT regions divided into quartiles. (C) The influence of RLFS at TSS on ES cell DRIP-seq signal level is shown (Wilcoxon rank sum test P is indicated). Input signal levels are shown as control. (D) ES cell DRIP-seq signal is plotted similarly as in C, from convT-positive and -negative TSS regions. The DRIP-signal is higher in convT-positive TSS (Wilcoxon rank sum test P is indicated, TSS with convT N = 11774, TSS without convT N = 12092, refer to **Figure 3—source data 2** for statistical analysis based on separate DRIP-seq replicates). (E) The percentages of breakpoint regions with no RSS motifs overlapping intragenic Pol2 stalling sites found in B-lineage cells are shown as barplots. The mean overlap observed in random sampling is indicated in grey bars (further statistical analysis is presented in **Supplementary file 3**). Categories with increasing cut-off for recurrence (1: non-recurrent in dim color, >1 and above: recurrent in darker color) were tested. (F) Overlap with RLFS, convT and annotated TSS is shown, as in E, for ETV6-RUNX1 NR-breakp (see also **Supplementary file 3**). (G) A schematic model illustrating how transcription from both strands (convT) or RLFS can locally arrest the Pol2 complex leading to recruitment of DNA damage-sensing complexes to R-loops, such as AID or BRCA (**Alt et al., 2013, Hatchi et al., 2015**), in an RSS-independent manner. (H) NR-breakp hotspot with the highest recurrence (*TPI1* locus) is shown. DRIP-seq signal (shown in tones of red overlaid with input control signal in blue), and RLFS motifs indicated as a magenta bar track represent two levels of independent data that were integrated with GRO-seq data (signal from REH and ES cells is shown) to characterize properties of convT and Pol2 stalling regions. The breakpoint data (NR-breakp in brown) and detected convT (in purple) and Pol2 stalling in B-lineage cells (in blue) are shown. At the recurrent breakpoint sites antisense transcription of neighboring gene (*SPSB2* primary transcript) leads to a broad convT region, as indicated in the figure. Elevated DRIP-signal indicates formation of DNA-RNA hybrids (see also **Figure 3—figure supplement 3**).

DOI: [10.7554/eLife.13087.018](https://doi.org/10.7554/eLife.13087.018)

The following source data is available for figure 3:

**Source data 1.** Breakpoint clustering to regions.

DOI: [10.7554/eLife.13087.019](https://doi.org/10.7554/eLife.13087.019)

**Source data 2.** Statistical analysis of separate DRIP-seq and DNase-seq replicates.

DOI: [10.7554/eLife.13087.020](https://doi.org/10.7554/eLife.13087.020)

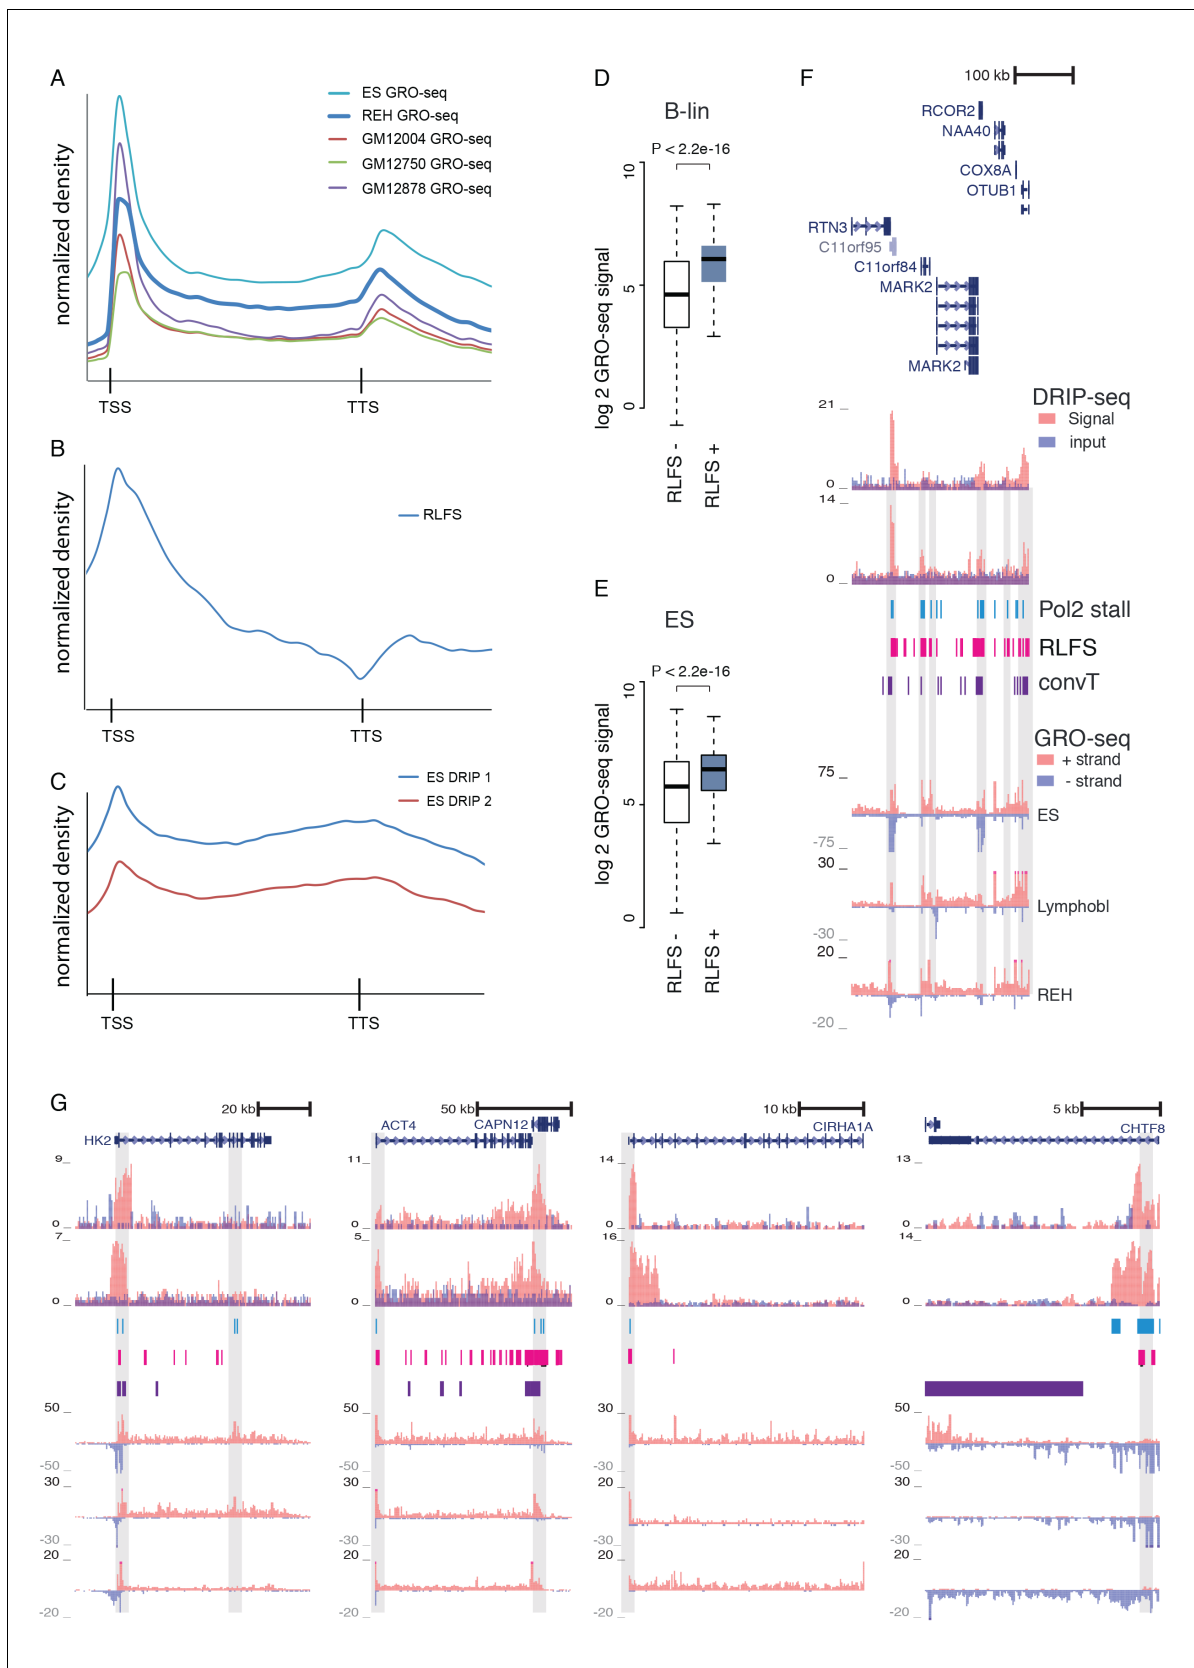

**Figure 3—figure supplement 1.** GRO-seq, RLFS and DRIP-seq signal profiles across genes. (A–C) Signal levels summarized across length-normalized transcribed gene loci: (A) GRO-seq in ES, REH and B-lymphoblastoid cells, (B) RLFS motif counts, (C) DRIP-seq signal in ES cells. The y-axis has an arbitrary scale. (D–E) Box plots of log<sub>2</sub> GRO-seq signal for B-lymphoblastoid cells (D) and ES cells (E) in RLFS- and RLFS+ conditions. (F) DRIP-seq signal profiles for various genes in ES cells. (G) DRIP-seq signal profiles for various genes in ES cells. The y-axis has an arbitrary scale. Figure 3—figure supplement 1 continued on next page

## Figure 3—figure supplement 1 continued

arbitrary scale normalized across all data points and the x-axis indicates the start and end of transcripts. The GRO-seq signal density across genes (in **A**) shown allows distinguishing signal increases that are indicative of Pol2 stalling. The TSS and TTS regions harbor sequence elements that favor formation of R-loops. (**D**) GRO-seq signal (B-lineage cells) compared between TSS with or without RLFS motifs is shown as box plots. The signal distributions differ significantly (Wilcoxon rank sum test P is indicated, TSS with RLFS N = 15646, TSS without RLFS N = 8220). (**E**) GRO-seq signal (ES cells) compared between TSS with or without RLFS motifs as in (**D**, **F**) An example genome region with high density of RLFS. DRIP-seq signal is shown in tones of red overlaid with input control signal in blue, RLFS motifs are indicated as a magenta bar track, GRO-seq overlaid signal from replicate samples is shown with + strand in red and - strand in blue. (**G**) Experimentally verified R-loop rich regions (**Ginno et al., 2013**) are shown as in **F**. The DRIP-seq signal is elevated frequently at TSS and TTS regions as shown at *HK2*, *ACTN4*, *CIRH1A* and *CHTF8* loci. Correspondence between RLFS density, GRO- and DRIP-seq signal levels and detected signal features (convT and Pol2 stalling) can be further examined based on tracks shown.

DOI: [10.7554/eLife.13087.021](https://doi.org/10.7554/eLife.13087.021)

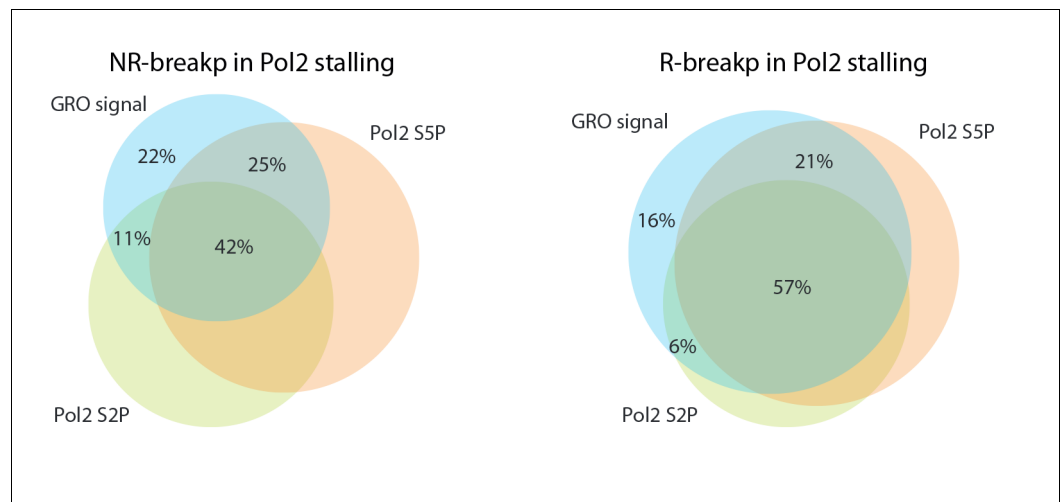

**Figure 3—figure supplement 2.** Venn diagrams comparing SV within Pol2 stalling regions based on GRO- and ChIP-seq profiles. The Pol2 stalling regions overlapping SV detected using GRO-seq, Pol2 S2P and Pol2 S5P ChIP-seq are compared in the Venn diagrams shown. Data for NR- and R-breakp is shown separately.

DOI: [10.7554/eLife.13087.022](https://doi.org/10.7554/eLife.13087.022)

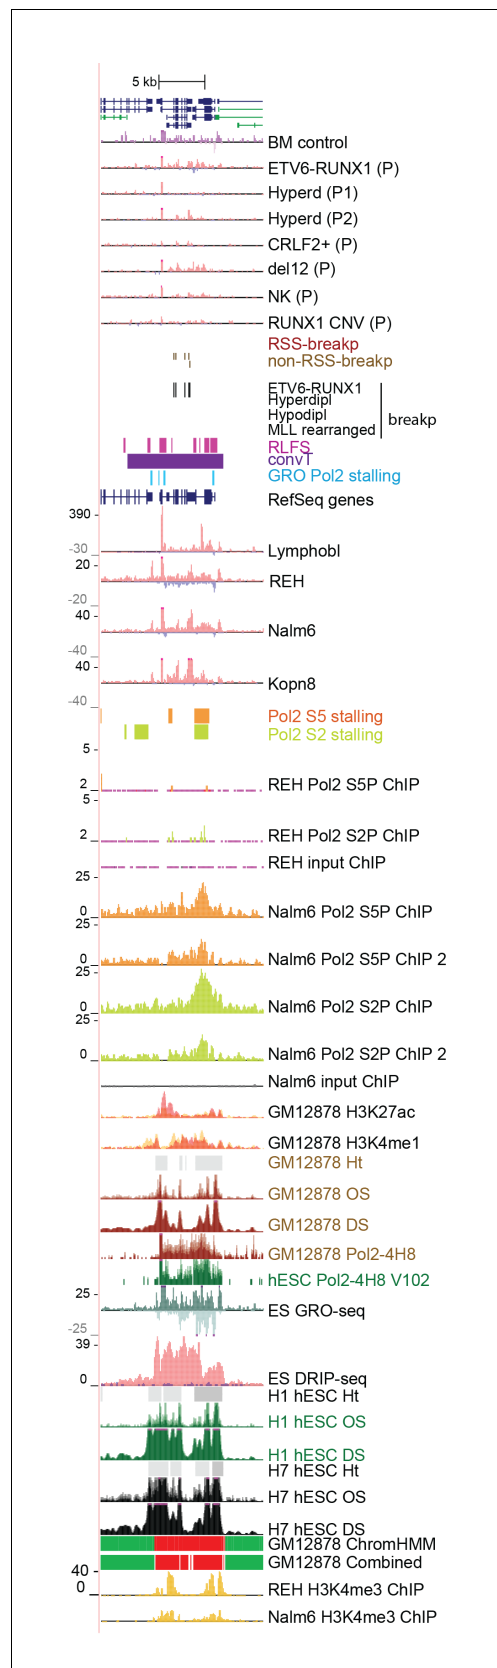

**Figure 3—figure supplement 3.** Data from all signal tracks for regions displayed in **Figure 3**. The comprehensive set of signal and annotation tracks shown are organized as in **Figure 1—figure supplement 4**. The region displayed correspond to the *TPI1* locus shown in **Figure 3H**.

DOI: [10.7554/eLife.13087.023](https://doi.org/10.7554/eLife.13087.023)



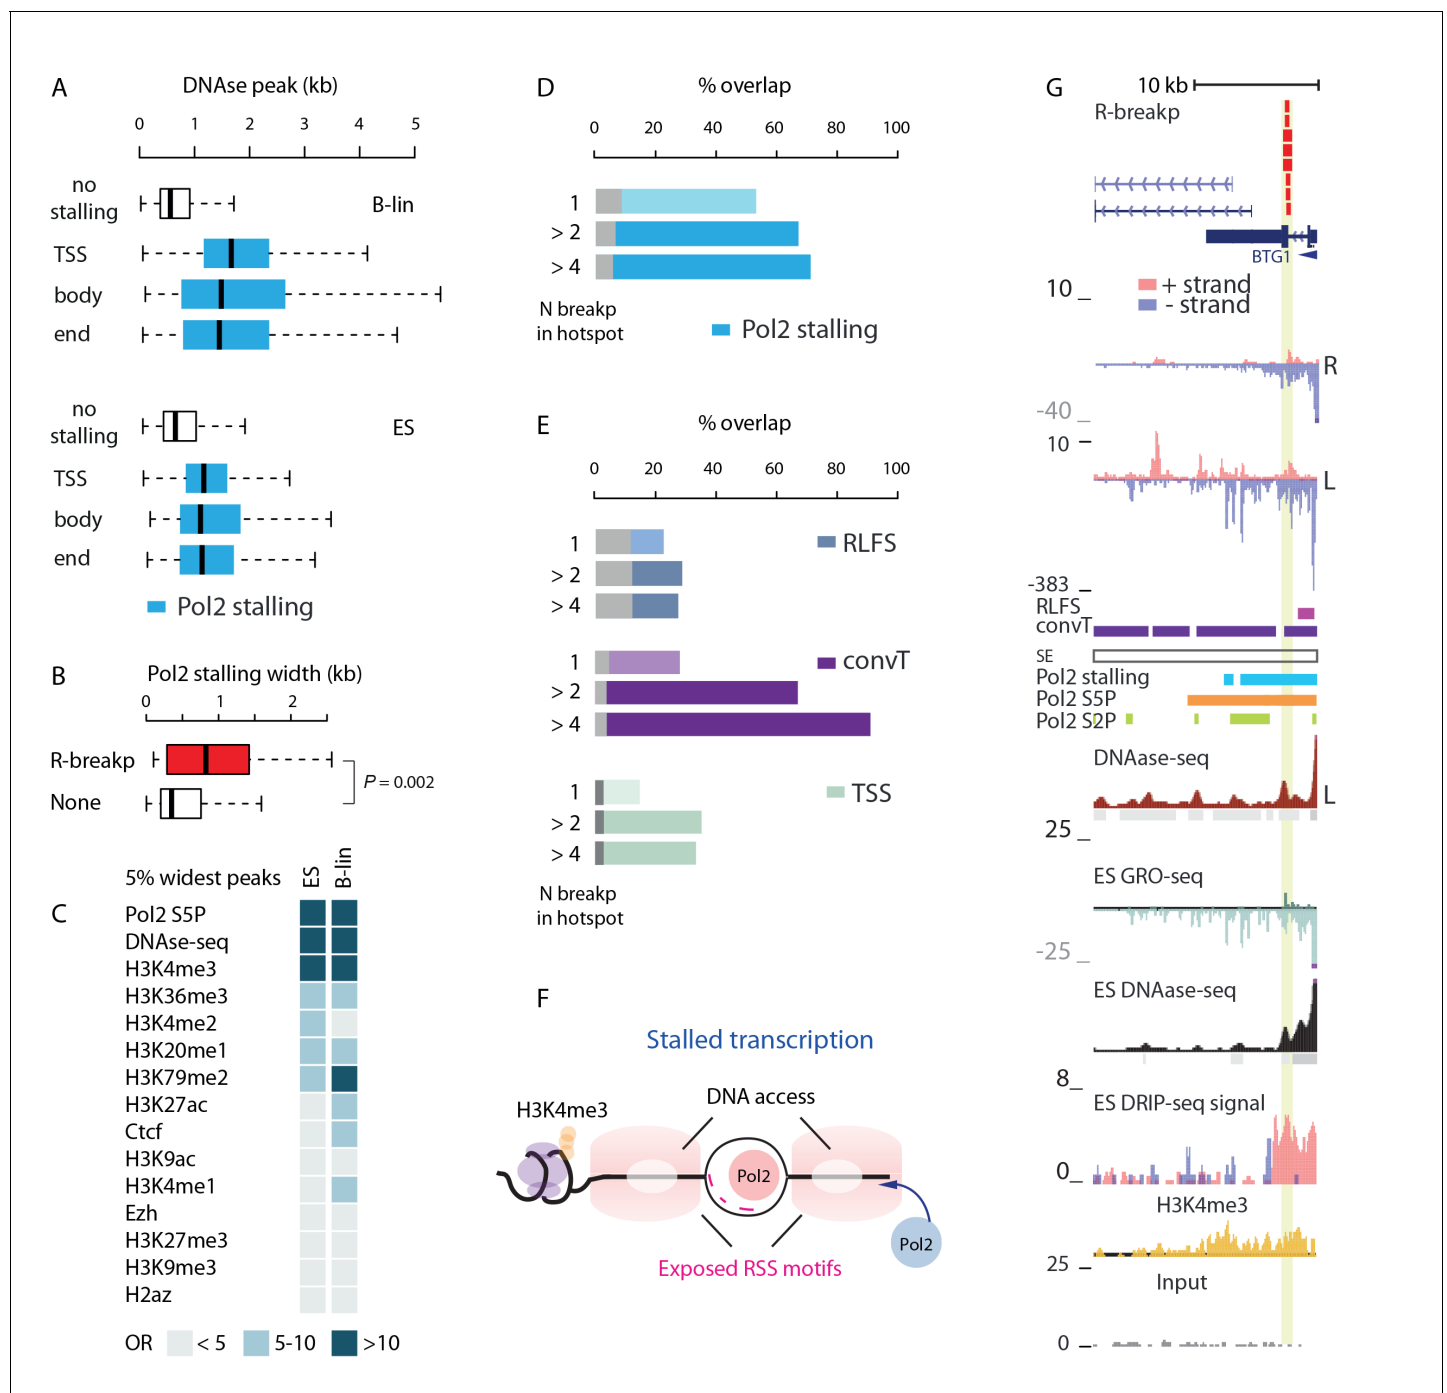

**Figure 4.** SV with RSS motifs localize to Pol2 stalling regions with broad open chromatin regions. (A) DNA access based on DNase-seq peak width (GM12878 or H1 ES from ENCODE) is compared between regions with no Pol2 stalling (no color) and overlapping Pol2 stalling (light blue, cell-specific Pol2 stalling coordinates are listed in **Figure 2—source data 1**) at TSS, body and end region of transcripts (refer to **Figure 3—source data 2** for statistical analysis based on separate DNase-seq replicates). (B) The TSS stalling width is compared between TSS harboring R-breakp and TSS with no breakpoints (Wilcoxon rank sum test  $P$  is indicated, TSS with R-breakp  $N = 38$ , TSS without breakpoints  $N = 11957$ , 95% CI for size difference 67–491 bp). (C) The 5% widest Pol2 stalling regions were overlapped with similarly defined widest peaks in different ChIP- and DNase-seq data (refer to **Figure 4—source data 1** for details and all statistics). The odds-ratio (OR) for the overlap is visualized in color from discrete categories (<5; 5–10; >10, with darker color tones indicating higher OR). Pol2 S5P, DNase-seq and H3K4me3 peaks had highest OR based on both B-lineage and ES cell data. D and E: The percentages of R-breakp overlapping Pol2 stalling (as in **Figure 3E**) or RLFS, convT and annotated TSS (as in **Figure 3F**) are shown as barplots, respectively. Overall, the recurrence was higher compared to NR-breakp and therefore two categories for recurrent R-breakp are shown (>2; >4). The overlap with convT reaches 91% at highly recurrent R-breakp hotspots (source data can be found in **Figure 2—source data 1**, S6 and statistics **Figure 4 continued on next page**

Figure 4 continued

for genes binned by their transcription level in **Supplementary file 3**. (F) A schematic model illustrating how the transcriptional features may lead to the recruitment of RAG1 and RAG2 based on RSS-motif recognition and chromatin. Pol2 stalling associated with DNA accessibility and wide deposition of the H3K4me3 mark. (G) R-breakp hotspot with the highest recurrence (*BTG1* locus) is shown. B-lymphoblastoid and ES cell tracks from DNase-seq and H3K4me3 from pre-B-ALL cells (Nalm6) represent signals with highest overlap to wide Pol2 stalling (other tracks as in **Figure 3H**, see also **Figure 4—figure supplement 1**).

DOI: [10.7554/eLife.13087.024](https://doi.org/10.7554/eLife.13087.024)

The following source data is available for figure 4:

**Source data 1.** Overlap of wide Pol2 stalling regions with unusually wide peaks representing other chromatin features.

DOI: [10.7554/eLife.13087.025](https://doi.org/10.7554/eLife.13087.025)

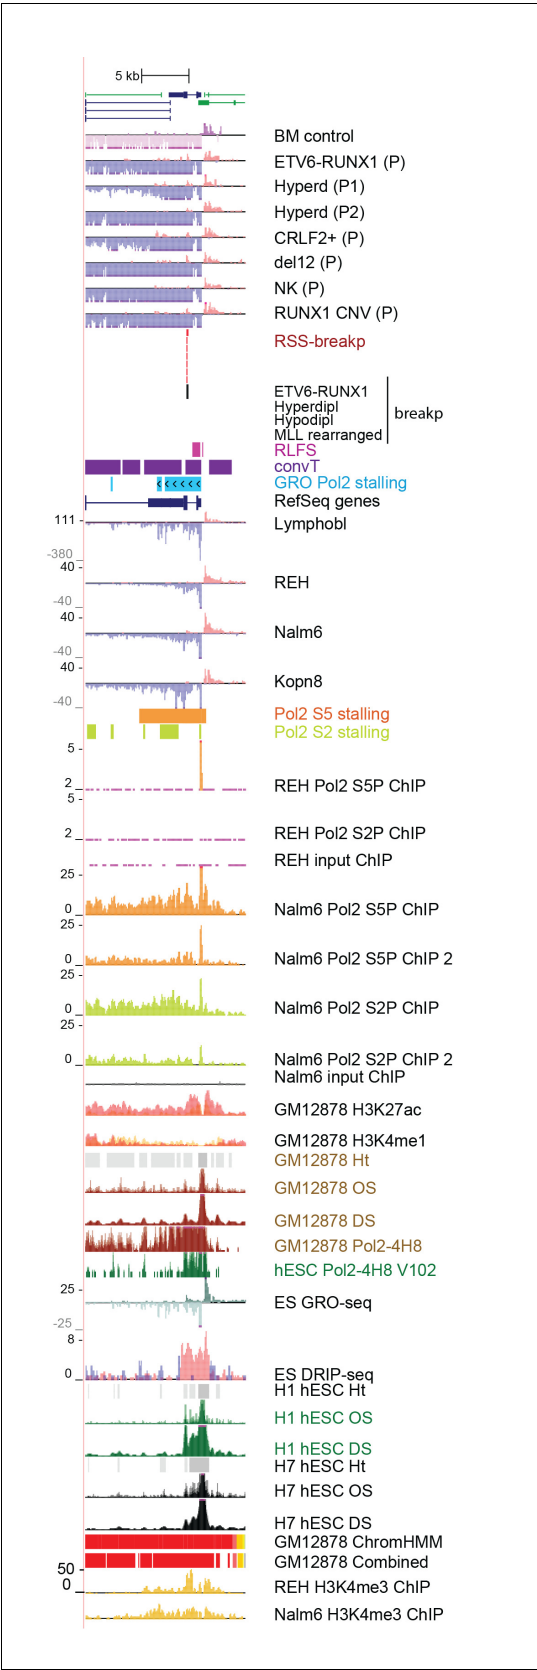

**Figure 4—figure supplement 1.** Data from all signal tracks for regions displayed in **Figure 4**. The comprehensive set of signal and annotation tracks shown are organized as in **Figure 1—figure supplement 4**. The regions *Figure 4—figure supplement 1 continued on next page*

Figure 4—figure supplement 1 continued

displayed correspond to the *BTG1* locus shown in **Figure 4G**. The *ZCCHC7* intronic region is shown in **A** and the *RAG2* locus in **B**.

DOI: [10.7554/eLife.13087.026](https://doi.org/10.7554/eLife.13087.026)

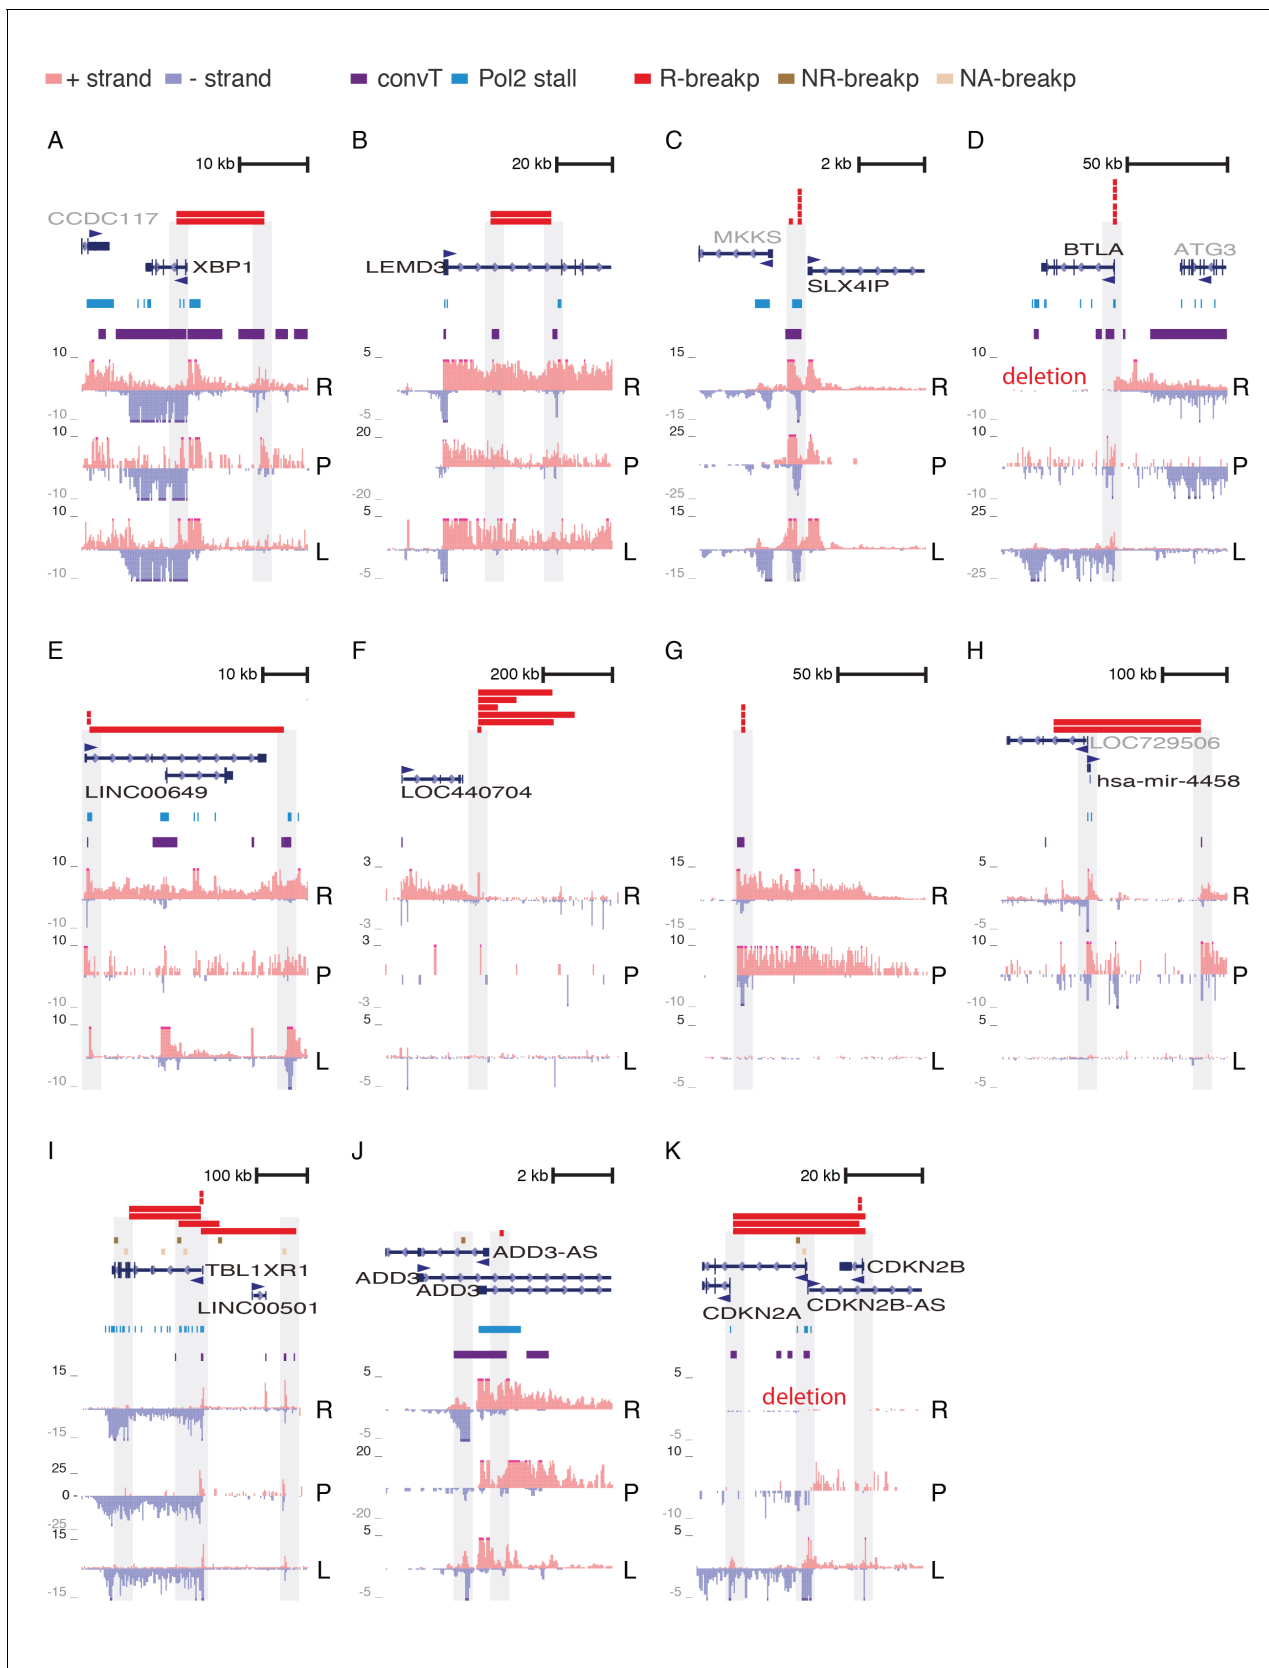

**Figure 4—figure supplement 2.** GRO-seq signal profile at multiple clustered deletion regions. Further examples of R-breakp regions, representing deletion clusters defined in (Papaemmanuil et al., 2014) (see [Supplementary file 2](#) listing genomic coordinates shown). The transcription signal at Figure 4—figure supplement 2 continued on next page

## Figure 4—figure supplement 2 continued

breakpoint ends is highlighted in each panel. Those breakpoints that are contained within the region are shown as wider colored bars. For breakpoints that end outside the region only one end is indicated (in panel G the short bars correspond to the full deletion regions that are very local). The regions are sorted in the following manner: coding gene loci that harbor R-breaks, similar non-coding gene loci, gene loci with R- and NR-breaks (including a few with no RSS-motif status, denoted NA-breakp). convT regions with short 1–2 kb transcripts on the opposite strand, typical of enhancer RNAs, overlap several R-breakp. To exemplify, in panel A, a distal upstream enhancer (and possibly an intragenic enhancer) nearby *XBP1* co-localizes with breakpoints while in B, the deletion occurs at short distance involving two intragenic enhancers of *LEMD3*. Notice that the cluster region shown in D and K harbor deletions in the REH cell line. In both cases the breakpoints are flanked by convT based on B-lymphoblastoid cell data. The *TBL1XR1* locus (in I) harbors most frequent NR-breakp that overlaps with elevated GRO-seq signal assigned as Pol2 stalling regions. R: REH (ETV6-RUNX1 fusion), P: ALL patient (ETV6-RUNX1 fusion), L: Lymphoblastoid cell line (normal karyotype).

DOI: [10.7554/eLife.13087.027](https://doi.org/10.7554/eLife.13087.027)

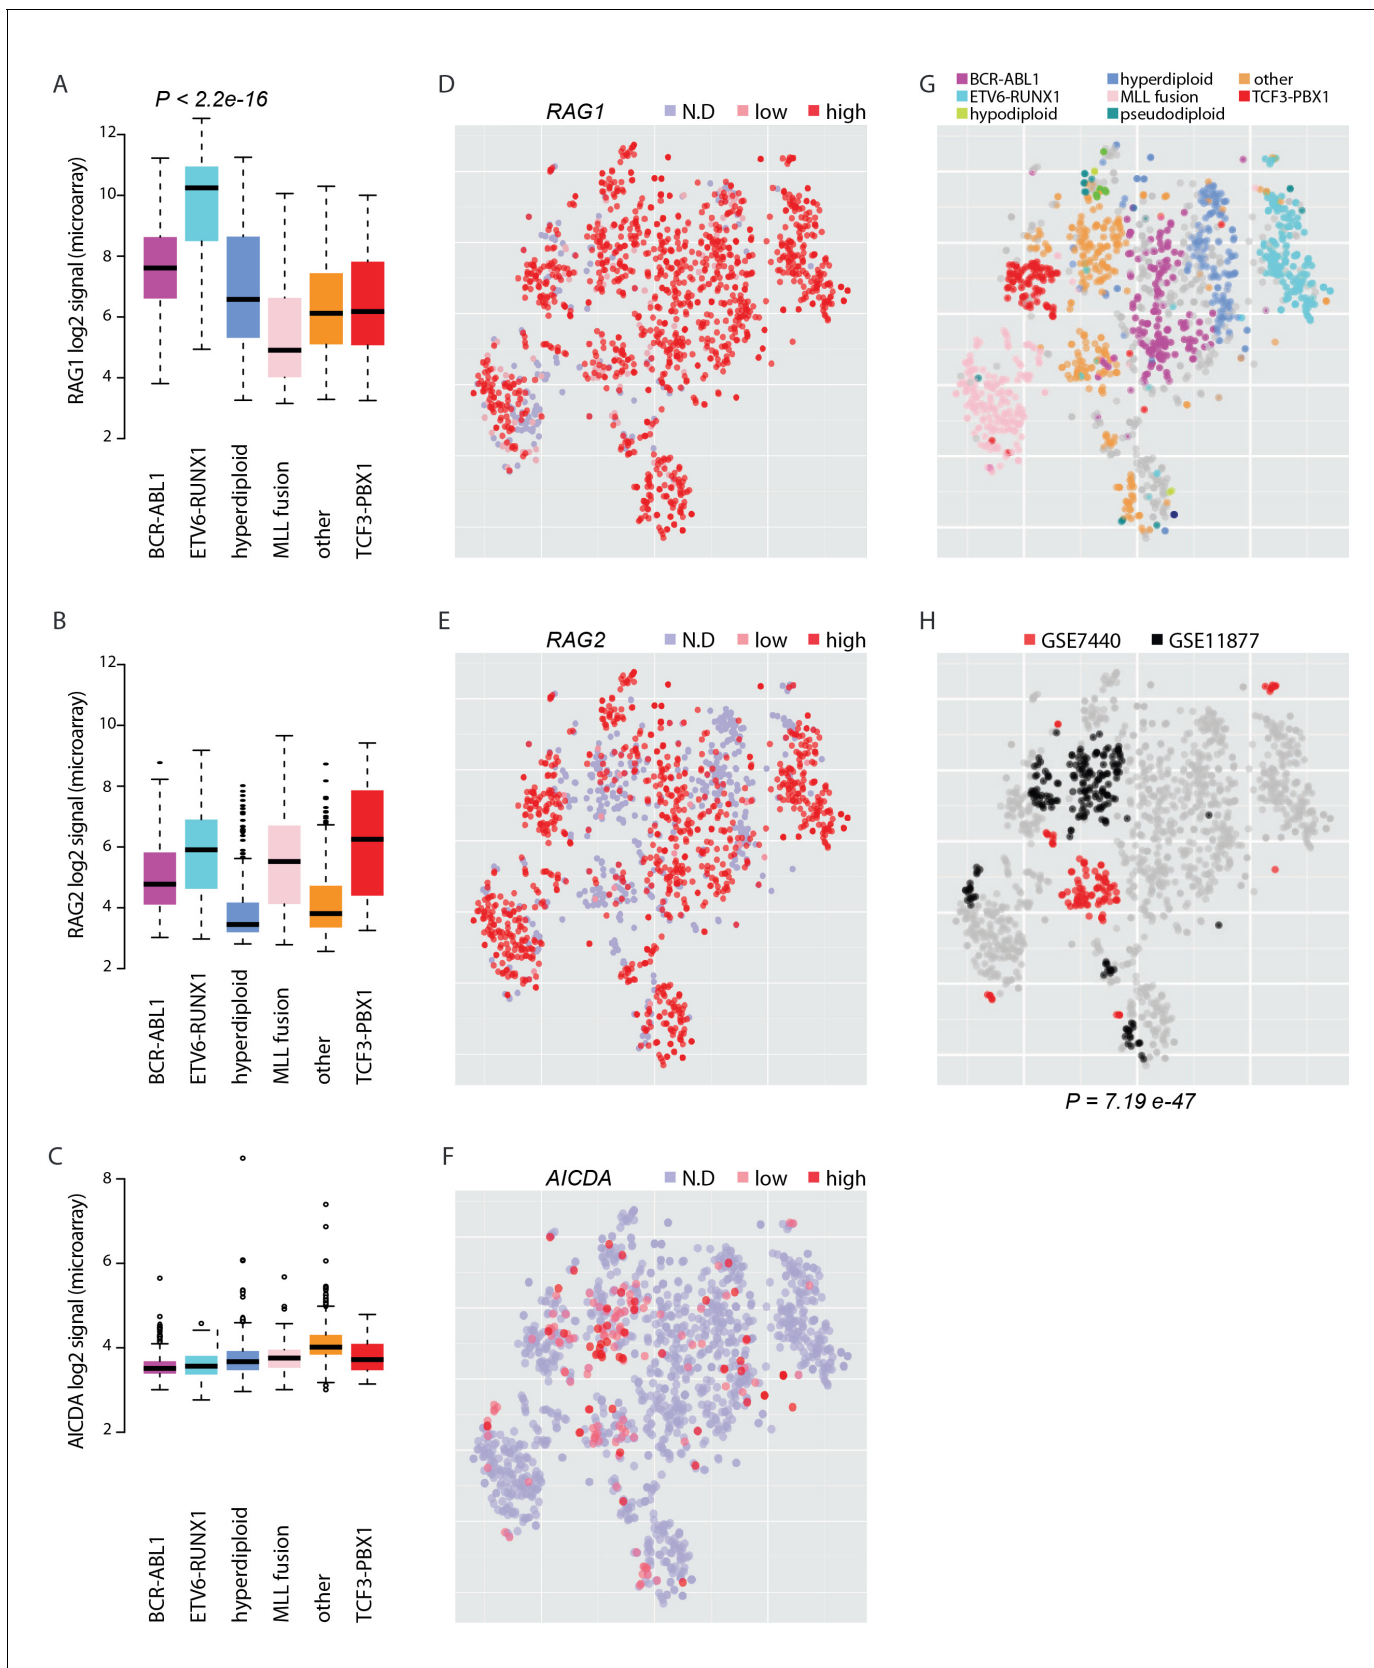

**Figure 5.** Expression of AID and RAG across molecular subtypes of leukemia. The log2 expression signal is summarized as boxplots for (A) RAG1 (B) RAG2 and (C) AICDA across the pre-B-ALL subtypes ( $N = 153$  BCR-ABL1,  $N = 153$  ETV6-RUNX1,  $N = 151$  hyperdiploid,  $N = 198$  MLL rearrangement, Figure 5 continued on next page

*Figure 5 continued*

$N = 267$  other,  $N = 82$  TCF3-PBX1). Wilcoxon rank sum test p-value is indicated for differential *RAG1* expression in the ETV6-RUNX1 subtype ( $N = 153$ , patients with cytogenetic subtype information  $N = 1008$ ) (in **A**). (**D–F**) Alternative representation of discrete expression states for *RAG1*, *RAG2*, and *AICDA*, respectively (red: high, pink: low, grey: not detected). The data points shown as a t-SNE map correspond to the full set of pre-B-ALL patient samples ( $N = 1382$ ) (see also **Figure 5—source data 1**). Their relative positions are defined by the transcriptome similarity. The sample groups can be compared to annotated cytogenetic types, as colored on the same map in (**G**, **H**). The location of high-risk samples ( $N=295$ ) from two independent studies is indicated in color on the same map (COG studies GSE7740 in red and GSE11877 in black, see also **Supplementary file 5**). Hypergeometric test p-value is indicated for enrichment of detected *AICDA* expression in the high risk studies ( $N = 112$ , refer to **Supplementary file 5** for population statistics).

DOI: [10.7554/eLife.13087.028](https://doi.org/10.7554/eLife.13087.028)

The following source data is available for figure 5:

**Source data 1.** pre-B-ALL transcriptome samples.

DOI: [10.7554/eLife.13087.029](https://doi.org/10.7554/eLife.13087.029)
